# Supplementary material
Source: ML conference proceedings conference paper supplement (https://openaccess.thecvf.com/content/ICCV2023/html/Bastani_SatlasPretrain_A_Large-Scale_ICCV_2023_paper.html)
Supplement: Supplementary file 1 [file Bastani_SatlasPretrain_A_Large-Scale_ICCV_2023_supplemental.pdf]

# SatlasPretrain: A Large-Scale Dataset for Remote Sensing Image Understanding

## Supplementary Material

Favyen Bastani Piper Wolters Ritwik Gupta Joe Ferdinando Aniruddha Kembhavi  
Allen Institute for AI

{favyenb, piperw, ritwikg, joef, anik}@allenai.org

The supplementary material is organized as follows:

- In Section A, we detail the SATLASPRETRAIN categories and how labels for each category were annotated. We also perform a per-category accuracy analysis on the final labels in SATLASPRETRAIN; we find that, despite the large scale of the dataset, the labels in each category are highly accurate.
- In Section B, we provide additional details about the experiments on downstream tasks, including per-dataset results.
- In Section C, we discuss synthetic aperture radar images captured by Sentinel-1 that are present in the dataset (but not used in our experiments).
- In Section D, we present additional analysis about geographical accuracy biases of models trained on SATLASPRETRAIN and downstream accuracy when pre-training on individual label types.
- In Section E, we show examples of each category in SATLASPRETRAIN, along with corresponding SATLASNET outputs.

### A. SATLASPRETRAIN Labels

Here, we provide additional details about the SATLASPRETRAIN categories and how labels for each category were annotated:

- In Section A.1, we show various statistics about the SATLASPRETRAIN categories and labels.
- In Section A.2, we discuss the potential use cases and practical applications of the SATLASPRETRAIN categories.
- In Section A.3, we detail the annotation tool that we used for the categories labeled with new annotation (12 categories with expert annotation and another 9 categories with Amazon Mechanical Turk), and discuss customizations that we made for individual categories to maximize annotation quality.
- In Section A.4, we detail OpenStreetMap processing, including heuristics that we used to select tiles and filter labels, and additional annotation we conducted to

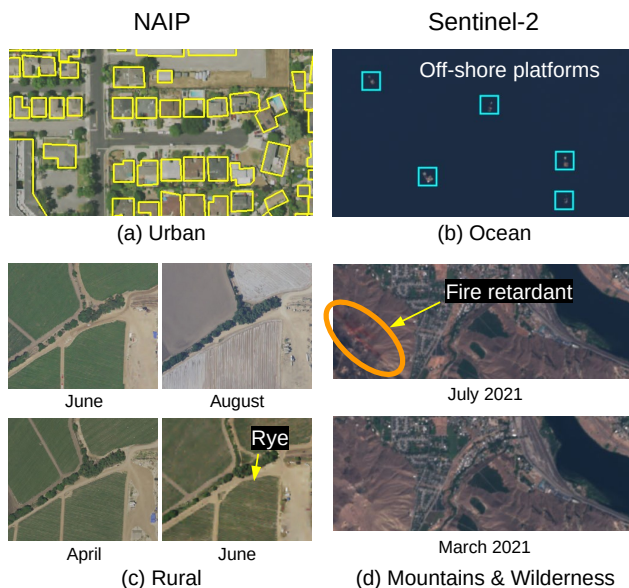

Figure 1: SATLASPRETRAIN incorporates both high-resolution NAIP and low-resolution Sentinel-2 images that exhibit very different characteristics. In (c) and (d), comparing multiple images helps distinguish rye crops and a fire retardant drop.

improve recall in the test set.

- In Section A.5, we perform an accuracy analysis for each of the 137 categories.
- In Section A.6, we detail how the test splits were selected.

#### A.1. Statistics

Figure 1 shows examples of the low-resolution Sentinel-2 and high-resolution NAIP images in SATLASPRETRAIN.

Figure 2 summarizes the SATLASPRETRAIN categories, organized by the seven label types.

For each category, Table 1 details the label type, data source, the number of tiles where the category is valid (but may have zero labels), the number of tiles where the cate-

gory has at least one label, and the number of labels. Table 1 also specifies a “use case” for each category; we discuss each of these use cases further in the next section.

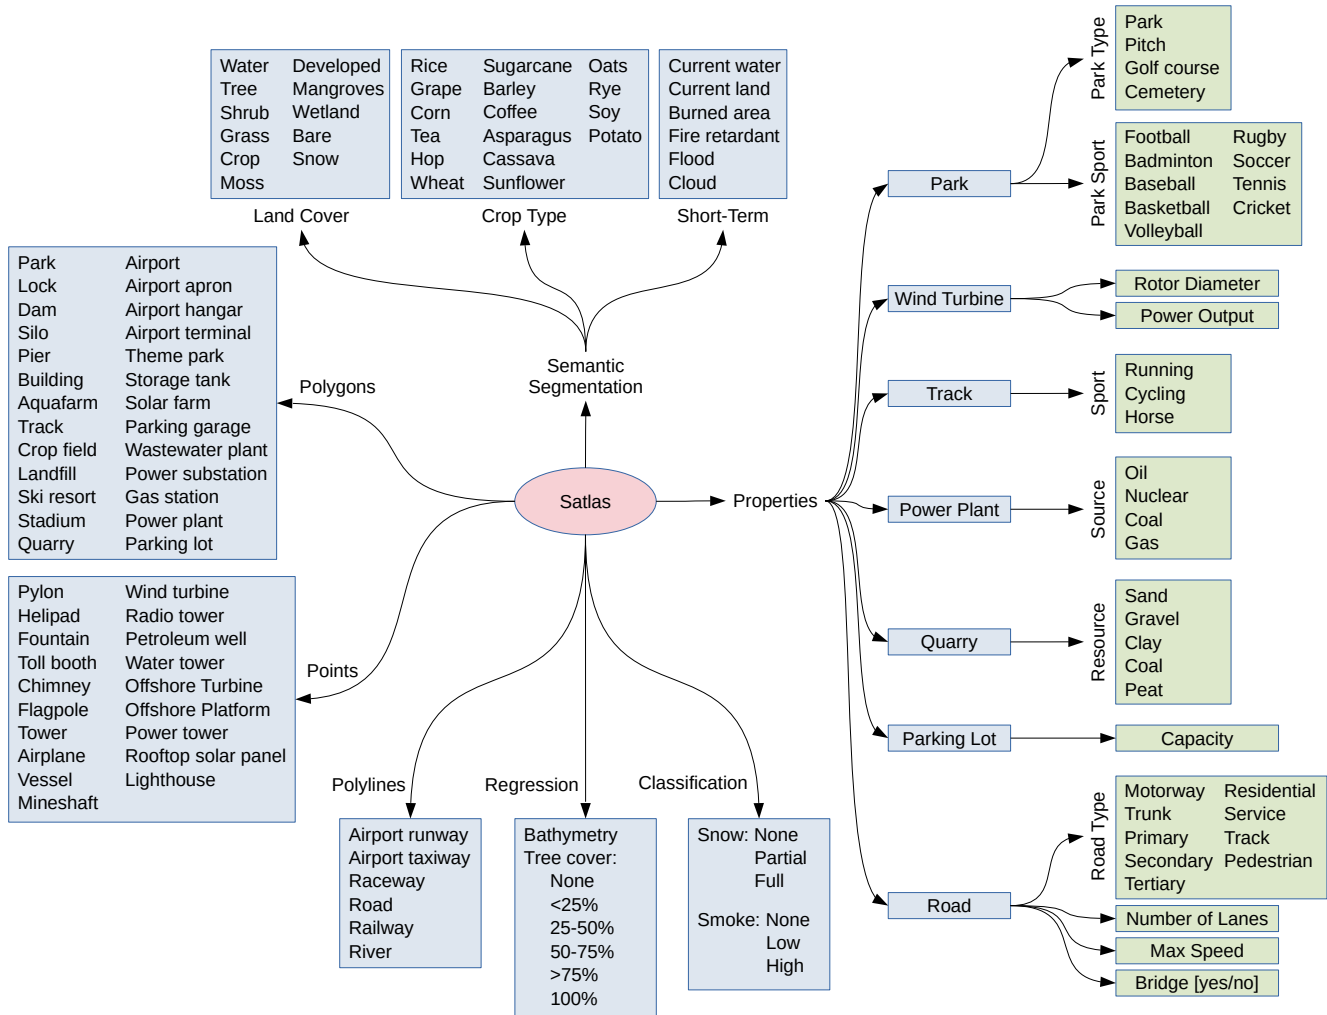

Figure 2: The 137 SATLASPRETRAIN categories, organized by the seven label types. Top: semantic segmentation. Left: polygons and points. Bottom: polylines, regression, and classification. Right: properties; for properties, we show the property category in green, and the point, polygon, or polyline category that the property is an attribute of in blue.

| Category               | Label Type | Dynamic?      | Data Source             | # Tiles Valid | # Tiles Nonzero | # Labels | Img Mode | Use Case        |
|------------------------|------------|---------------|-------------------------|---------------|-----------------|----------|----------|-----------------|
| Aquafarm               | Polygon    | Slow-Changing | OpenStreetMap           | 740297        | 7555            | 66328    | Both     | Infrastructure  |
| Lock                   | Polygon    | Slow-Changing | OpenStreetMap           | 740297        | 2079            | 3281     | Both     | Infrastructure  |
| Dam                    | Polygon    | Slow-Changing | OpenStreetMap           | 740297        | 40016           | 53030    | Both     | Infrastructure  |
| Solar Farm             | Polygon    | Slow-Changing | OpenStreetMap           | 740297        | 18278           | 32803    | Both     | Infrastructure  |
| Power Plant            | Polygon    | Slow-Changing | OpenStreetMap           | 740297        | 8296            | 9538     | Both     | Infrastructure  |
| Gas Station            | Polygon    | Slow-Changing | OpenStreetMap           | 740297        | 89443           | 190697   | High-res | Digital Maps    |
| Park                   | Polygon    | Slow-Changing | OpenStreetMap           | 740297        | 385486          | 3317581  | Both     | Digital Maps    |
| Parking Garage         | Polygon    | Slow-Changing | OpenStreetMap           | 740297        | 7674            | 18053    | Both     | Digital Maps    |
| Parking Lot            | Polygon    | Slow-Changing | OpenStreetMap           | 740297        | 247031          | 3884224  | Both     | Digital Maps    |
| Landfill               | Polygon    | Slow-Changing | OpenStreetMap           | 740297        | 31704           | 47478    | Both     | Infrastructure  |
| Quarry                 | Polygon    | Slow-Changing | OpenStreetMap           | 740297        | 122257          | 207694   | Both     | Infrastructure  |
| Stadium                | Polygon    | Slow-Changing | OpenStreetMap           | 740297        | 36320           | 48305    | Both     | Digital Maps    |
| Airport                | Polygon    | Slow-Changing | OpenStreetMap           | 740297        | 35773           | 36761    | Both     | Infrastructure  |
| Airport Apron          | Polygon    | Slow-Changing | OpenStreetMap           | 740297        | 18484           | 41223    | Both     | Infrastructure  |
| Airport Hangar         | Polygon    | Slow-Changing | OpenStreetMap           | 740297        | 10429           | 54280    | High-res | Infrastructure  |
| Airport Terminal       | Polygon    | Slow-Changing | OpenStreetMap           | 740297        | 6067            | 8918     | Both     | Infrastructure  |
| Ski Resort             | Polygon    | Slow-Changing | OpenStreetMap           | 740297        | 4845            | 6196     | Both     | Digital Maps    |
| Theme Park             | Polygon    | Slow-Changing | OpenStreetMap           | 740297        | 5631            | 6520     | Both     | Digital Maps    |
| Storage Tank           | Polygon    | Slow-Changing | OpenStreetMap           | 740297        | 58560           | 411079   | High-res | Infrastructure  |
| Silo                   | Polygon    | Slow-Changing | OpenStreetMap           | 740297        | 32737           | 194172   | High-res | Infrastructure  |
| Track                  | Polygon    | Slow-Changing | OpenStreetMap           | 740297        | 54969           | 87748    | Both     | Digital Maps    |
| Wastewater Plant       | Polygon    | Slow-Changing | OpenStreetMap           | 740297        | 53541           | 74155    | Both     | Infrastructure  |
| Power Substation       | Polygon    | Slow-Changing | OpenStreetMap           | 740297        | 199395          | 451149   | High-res | Infrastructure  |
| Pier                   | Polygon    | Slow-Changing | OpenStreetMap           | 740297        | 3611            | 24628    | High-res | Digital Maps    |
| Crop Field             | Polygon    | Slow-Changing | OpenStreetMap           | 740297        | 349482          | 6577038  | Both     | Infrastructure  |
| Building               | Polygon    | Slow-Changing | Microsoft Buildings     | 33632         | 33632           | 48746983 | High-res | Digital Maps    |
| Wind Turbine           | Point      | Slow-Changing | OpenStreetMap           | 523337        | 46141           | 354120   | Both     | Infrastructure  |
| Lighthouse             | Point      | Slow-Changing | OpenStreetMap           | 523337        | 7548            | 9541     | Both     | Infrastructure  |
| Mineshaft              | Point      | Slow-Changing | OpenStreetMap           | 523337        | 3409            | 10703    | Both     | Infrastructure  |
| Aerialway Pylon        | Point      | Slow-Changing | OpenStreetMap           | 523337        | 6416            | 121108   | Both     | Infrastructure  |
| Helipad                | Point      | Slow-Changing | OpenStreetMap           | 523337        | 33661           | 53858    | Both     | Infrastructure  |
| Fountain               | Point      | Slow-Changing | OpenStreetMap           | 523337        | 7452            | 28139    | High-res | Digital Maps    |
| Toll Booth             | Point      | Slow-Changing | OpenStreetMap           | 523337        | 1713            | 4257     | High-res | Digital Maps    |
| Chimney                | Point      | Slow-Changing | OpenStreetMap           | 523337        | 2065            | 6542     | High-res | Infrastructure  |
| Communications Tower   | Point      | Slow-Changing | OpenStreetMap           | 523337        | 2191            | 2948     | Both     | Infrastructure  |
| Flagpole               | Point      | Slow-Changing | OpenStreetMap           | 523337        | 7350            | 26916    | High-res | Digital Maps    |
| Petroleum Well         | Point      | Slow-Changing | OpenStreetMap           | 523337        | 19271           | 158672   | Both     | Infrastructure  |
| Water Tower            | Point      | Slow-Changing | OpenStreetMap           | 523337        | 87379           | 130089   | Both     | Infrastructure  |
| Offshore Wind Turbine  | Point      | Slow-Changing | New Annotation - Expert | 523337        | 1327            | 8726     | Both     | Infrastructure  |
| Offshore Platform      | Point      | Slow-Changing | New Annotation - Expert | 523337        | 1393            | 2275     | Both     | Infrastructure  |
| Power Tower            | Point      | Slow-Changing | OpenStreetMap           | 523337        | 404398          | 8347197  | Both     | Infrastructure  |
| Airplane               | Point      | Dynamic       | New Annotation - AMT    | 374           | 374             | 26568    | High-res | Airplane/Vessel |
| Rooftop Solar Panel    | Point      | Slow-Changing | New Annotation - AMT    | 27            | 27              | 25413    | High-res | Infrastructure  |
| Vessel                 | Point      | Dynamic       | New Annotation - Expert | 2032          | 2032            | 5002     | Low-res  | Airplane/Vessel |
| Airport Runway         | Polyline   | Slow-Changing | OpenStreetMap           | 266037        | 65248           | 80987    | Both     | Infrastructure  |
| Airport Taxiway        | Polyline   | Slow-Changing | OpenStreetMap           | 266037        | 24582           | 267064   | Both     | Infrastructure  |
| Raceway                | Polyline   | Slow-Changing | OpenStreetMap           | 266037        | 12769           | 35333    | Both     | Digital Maps    |
| Road                   | Polyline   | Slow-Changing | OpenStreetMap           | 266037        | 204987          | 35880795 | Both     | Digital Maps    |
| Railway                | Polyline   | Slow-Changing | OpenStreetMap           | 266037        | 119970          | 694271   | Both     | Digital Maps    |
| River                  | Polyline   | Slow-Changing | OpenStreetMap           | 266037        | 115120          | 246563   | Both     | Digital Maps    |
| Land Cover - Water     | Segment    | Slow-Changing | WorldCover              | 59032         | 55152           | 2642496  | Both     | Land Cover      |
| Land Cover - Developed | Segment    | Slow-Changing | WorldCover              | 59032         | 58534           | 4284426  | Both     | Land Cover      |
| Land Cover - Tree      | Segment    | Slow-Changing | WorldCover              | 59032         | 58267           | 16669429 | Both     | Land Cover      |
| Land Cover - Shrub     | Segment    | Slow-Changing | WorldCover              | 59032         | 18075           | 2308571  | Both     | Land Cover      |
| Land Cover - Grass     | Segment    | Slow-Changing | WorldCover              | 59032         | 58383           | 16954305 | Both     | Land Cover      |
| Land Cover - Crop      | Segment    | Slow-Changing | WorldCover              | 59032         | 57172           | 7251955  | Both     | Land Cover      |
| Land Cover - Bare      | Segment    | Slow-Changing | WorldCover              | 59032         | 58505           | 8770137  | Both     | Land Cover      |
| Land Cover - Snow      | Segment    | Slow-Changing | WorldCover              | 59032         | 89              | 1460     | Both     | Land Cover      |
| Land Cover - Wetland   | Segment    | Slow-Changing | WorldCover              | 59032         | 22836           | 547734   | Both     | Land Cover      |

Table 1: Details for each Satlas category. The number of valid tiles indicates tiles where the category is annotated; this includes tiles that contain zero instances of the category. The number of non-zero tiles includes only tiles where there is at least one label in the category. Img Mode indicates whether the category is used in both image modes or just one: (a) some slow-changing categories are excluded when using low-resolution images because they are not visible; and (b) dynamic categories are always labeled in only one image type. The use cases listed in the last column are discussed further in the next section.

| Category                 | Label Type | Dynamic?      | Data Source             | # Tiles Valid | # Tiles Nonzero | # Labels | Img Mode | Use Case       |
|--------------------------|------------|---------------|-------------------------|---------------|-----------------|----------|----------|----------------|
| Land Cover - Mangroves   | Segment    | Slow-Changing | WorldCover              | 59032         | 657             | 21645    | Both     | Land Cover     |
| Land Cover - Moss        | Segment    | Slow-Changing | WorldCover              | 59032         | 542             | 53586    | Both     | Land Cover     |
| Crop Type - Rice         | Segment    | Slow-Changing | OpenStreetMap           | 19215         | 10685           | 259013   | Both     | Crop Type      |
| Crop Type - Grape        | Segment    | Slow-Changing | OpenStreetMap           | 19215         | 294             | 568      | Both     | Crop Type      |
| Crop Type - Corn         | Segment    | Slow-Changing | OpenStreetMap           | 19215         | 2874            | 16199    | Both     | Crop Type      |
| Crop Type - Sugarcane    | Segment    | Slow-Changing | OpenStreetMap           | 19215         | 2097            | 8399     | Both     | Crop Type      |
| Crop Type - Tea          | Segment    | Slow-Changing | OpenStreetMap           | 19215         | 553             | 3060     | Both     | Crop Type      |
| Crop Type - Hop          | Segment    | Slow-Changing | OpenStreetMap           | 19215         | 626             | 6859     | Both     | Crop Type      |
| Crop Type - Wheat        | Segment    | Slow-Changing | OpenStreetMap           | 19215         | 1342            | 5281     | Both     | Crop Type      |
| Crop Type - Soy          | Segment    | Slow-Changing | OpenStreetMap           | 19215         | 615             | 4981     | Both     | Crop Type      |
| Crop Type - Barley       | Segment    | Slow-Changing | OpenStreetMap           | 19215         | 289             | 1875     | Both     | Crop Type      |
| Crop Type - Oats         | Segment    | Slow-Changing | OpenStreetMap           | 19215         | 2               | 2        | Both     | Crop Type      |
| Crop Type - Rye          | Segment    | Slow-Changing | OpenStreetMap           | 19215         | 10              | 15       | Both     | Crop Type      |
| Crop Type - Cassava      | Segment    | Slow-Changing | OpenStreetMap           | 19215         | 64              | 134      | Both     | Crop Type      |
| Crop Type - Potato       | Segment    | Slow-Changing | OpenStreetMap           | 19215         | 48              | 120      | Both     | Crop Type      |
| Crop Type - Sunflower    | Segment    | Slow-Changing | OpenStreetMap           | 19215         | 157             | 332      | Both     | Crop Type      |
| Crop Type - Asparagus    | Segment    | Slow-Changing | OpenStreetMap           | 19215         | 65              | 127      | Both     | Crop Type      |
| Crop Type - Coffee       | Segment    | Slow-Changing | OpenStreetMap           | 19215         | 351             | 916      | Both     | Crop Type      |
| Coast - Water            | Segment    | Dynamic       | New Annotation - AMT    | 3507          | 3507            | 26201    | High-res | Coastline      |
| Coast - Land             | Segment    | Dynamic       | New Annotation - AMT    | 3507          | 3507            | 26201    | High-res | Coastline      |
| Burned Area              | Segment    | Dynamic       | New Annotation - AMT    | 399           | 319             | 883      | Low-res  | Wildfire       |
| Fire Retardant           | Segment    | Dynamic       | New Annotation - AMT    | 399           | 131             | 415      | Low-res  | Wildfire       |
| Flood                    | Segment    | Dynamic       | C2S                     | 2751          | 1829            | 45110    | Low-res  | Flood/Cloud    |
| Cloud                    | Segment    | Dynamic       | C2S                     | 2751          | 1227            | 8463     | Low-res  | Flood/Cloud    |
| Bathymetry               | Regress    | Slow-Changing | NOAA Lidar Scans        | 5123          | 5123            | 21306701 | Both     | Bathymetry     |
| Tree Cover - None        | Regress    | Slow-Changing | New Annotation - Expert | 2831          | 2831            | 1296     | Both     | Tree Cover     |
| Tree Cover - Sparse      | Regress    | Slow-Changing | New Annotation - Expert | 2831          | 2831            | 2450     | Both     | Tree Cover     |
| Tree Cover - Low         | Regress    | Slow-Changing | New Annotation - Expert | 2831          | 2831            | 455      | Both     | Tree Cover     |
| Tree Cover - Medium      | Regress    | Slow-Changing | New Annotation - Expert | 2831          | 2831            | 284      | Both     | Tree Cover     |
| Tree Cover - High        | Regress    | Slow-Changing | New Annotation - Expert | 2831          | 2831            | 248      | Both     | Tree Cover     |
| Tree Cover - Full        | Regress    | Slow-Changing | New Annotation - Expert | 2831          | 2831            | 408      | Both     | Tree Cover     |
| Wind Turb. - Rotor Diam. | Property   | Slow-Changing | OpenStreetMap           | 4067          | 4067            | 27661    | Both     | Infrastructure |
| Wind Turbine - Power     | Property   | Slow-Changing | OpenStreetMap           | 17506         | 17506           | 122398   | Both     | Infrastructure |
| Parking Lot - Capacity   | Property   | Slow-Changing | OpenStreetMap           | 70661         | 70661           | 337542   | Both     | Digital Maps   |
| Track - Running          | Property   | Slow-Changing | OpenStreetMap           | 32670         | 26277           | 41950    | Both     | Digital Maps   |
| Track - Cycling          | Property   | Slow-Changing | OpenStreetMap           | 32670         | 2321            | 4612     | Both     | Digital Maps   |
| Track - Horse            | Property   | Slow-Changing | OpenStreetMap           | 32670         | 5170            | 7415     | Both     | Digital Maps   |
| Road Type - Motorway     | Property   | Slow-Changing | OpenStreetMap           | 238868        | 33340           | 577135   | Both     | Digital Maps   |
| Road Type - Trunk        | Property   | Slow-Changing | OpenStreetMap           | 238868        | 35179           | 303723   | Both     | Digital Maps   |
| Road Type - Primary      | Property   | Slow-Changing | OpenStreetMap           | 238868        | 79694           | 776820   | Both     | Digital Maps   |
| Road Type - Secondary    | Property   | Slow-Changing | OpenStreetMap           | 238868        | 105240          | 1003712  | Both     | Digital Maps   |
| Road Type - Tertiary     | Property   | Slow-Changing | OpenStreetMap           | 238868        | 135065          | 1065756  | Both     | Digital Maps   |
| Road Type - Residential  | Property   | Slow-Changing | OpenStreetMap           | 238868        | 223834          | 9671420  | Both     | Digital Maps   |
| Road Type - Service      | Property   | Slow-Changing | OpenStreetMap           | 238868        | 206058          | 17566909 | Both     | Digital Maps   |
| Road Type - Track        | Property   | Slow-Changing | OpenStreetMap           | 238868        | 146859          | 1108582  | Both     | Digital Maps   |
| Road Type - Pedestrian   | Property   | Slow-Changing | OpenStreetMap           | 238868        | 76743           | 5070309  | Both     | Digital Maps   |
| Road - Number of Lanes   | Property   | Slow-Changing | OpenStreetMap           | 147367        | 147367          | 3331621  | Both     | Digital Maps   |
| Road - Max Speed         | Property   | Slow-Changing | OpenStreetMap           | 110753        | 110753          | 2183903  | Both     | Digital Maps   |
| Road - Bridge            | Property   | Slow-Changing | OpenStreetMap           | 266037        | 100205          | 518177   | Both     | Digital Maps   |
| Road - Not Bridge        | Property   | Slow-Changing | OpenStreetMap           | 266037        | 266037          | 35362618 | Both     | Digital Maps   |
| Power Plant - Oil        | Property   | Slow-Changing | OpenStreetMap           | 8484          | 756             | 867      | Both     | Infrastructure |
| Power Plant - Nuclear    | Property   | Slow-Changing | OpenStreetMap           | 8484          | 370             | 400      | Both     | Infrastructure |
| Power Plant - Coal       | Property   | Slow-Changing | OpenStreetMap           | 8484          | 3368            | 3723     | Both     | Infrastructure |
| Power Plant - Gas        | Property   | Slow-Changing | OpenStreetMap           | 8484          | 4117            | 4762     | Both     | Infrastructure |
| Quarry - Sand            | Property   | Slow-Changing | OpenStreetMap           | 7910          | 2226            | 2796     | Both     | Infrastructure |
| Quarry - Gravel          | Property   | Slow-Changing | OpenStreetMap           | 7910          | 1427            | 1855     | Both     | Infrastructure |
| Quarry - Clay            | Property   | Slow-Changing | OpenStreetMap           | 7910          | 877             | 2836     | Both     | Infrastructure |
| Quarry - Coal            | Property   | Slow-Changing | OpenStreetMap           | 7910          | 1640            | 2099     | Both     | Infrastructure |
| Quarry - Peat            | Property   | Slow-Changing | OpenStreetMap           | 7910          | 1803            | 3048     | Both     | Infrastructure |

Table 1 (continued): Details for each Satlas category. The number of valid tiles indicates tiles where the category is annotated; this includes tiles that contain zero instances of the category. The number of non-zero tiles includes only tiles where there is at least one label in the category. Img Mode indicates whether the category is used in both image modes or just one: (a) some slow-changing categories are excluded when using low-resolution images because they are not visible; and (b) dynamic categories are always labeled in only one image type. The use cases listed in the last column are discussed further in the next section.

| Category                       | Label Type | Dynamic?      | Data Source             | # Tiles Valid | # Tiles Nonzero | # Labels | Img Mode | Use Case     |
|--------------------------------|------------|---------------|-------------------------|---------------|-----------------|----------|----------|--------------|
| Park Type - City Park          | Property   | Slow-Changing | OpenStreetMap           | 578761        | 226794          | 1168319  | Both     | Digital Maps |
| Park Type - Pitch              | Property   | Slow-Changing | OpenStreetMap           | 578761        | 341244          | 2045889  | Both     | Digital Maps |
| Park Type - Golf Course        | Property   | Slow-Changing | OpenStreetMap           | 578761        | 44141           | 64919    | Both     | Digital Maps |
| Park Type - Cemetery           | Property   | Slow-Changing | OpenStreetMap           | 578761        | 325478          | 480511   | Both     | Digital Maps |
| Park Sport - American Football | Property   | Slow-Changing | OpenStreetMap           | 273915        | 13197           | 19227    | Both     | Digital Maps |
| Park Sport - Badminton         | Property   | Slow-Changing | OpenStreetMap           | 273915        | 1717            | 4259     | Both     | Digital Maps |
| Park Sport - Baseball          | Property   | Slow-Changing | OpenStreetMap           | 273915        | 44641           | 151679   | Both     | Digital Maps |
| Park Sport - Basketball        | Property   | Slow-Changing | OpenStreetMap           | 273915        | 74755           | 208555   | Both     | Digital Maps |
| Park Sport - Cricket           | Property   | Slow-Changing | OpenStreetMap           | 273915        | 6697            | 12265    | Both     | Digital Maps |
| Park Sport - Rugby             | Property   | Slow-Changing | OpenStreetMap           | 273915        | 5151            | 9511     | Both     | Digital Maps |
| Park Sport - Soccer            | Property   | Slow-Changing | OpenStreetMap           | 273915        | 194269          | 504876   | Both     | Digital Maps |
| Park Sport - Tennis            | Property   | Slow-Changing | OpenStreetMap           | 273915        | 116611          | 419207   | Both     | Digital Maps |
| Park Sport - Volleyball        | Property   | Slow-Changing | OpenStreetMap           | 273915        | 14857           | 22681    | Both     | Digital Maps |
| Snow - None                    | Classify   | Dynamic       | New Annotation - Expert | 6340          | 5691            | 5699     | Low-res  | Snow         |
| Snow - Partial                 | Classify   | Dynamic       | New Annotation - Expert | 6340          | 248             | 248      | Low-res  | Snow         |
| Snow - Full                    | Classify   | Dynamic       | New Annotation - Expert | 6340          | 401             | 401      | Low-res  | Snow         |
| Smoke - None                   | Classify   | Dynamic       | New Annotation - AMT    | 197           | 177             | 440      | Low-res  | Wildfire     |
| Smoke - Low                    | Classify   | Dynamic       | New Annotation - AMT    | 197           | 45              | 111      | Low-res  | Wildfire     |
| Smoke - High                   | Classify   | Dynamic       | New Annotation - AMT    | 197           | 12              | 14       | Low-res  | Wildfire     |

Table 1 (continued): Details for each Satlas category. The number of valid tiles indicates tiles where the category is annotated; this includes tiles that contain zero instances of the category. The number of non-zero tiles includes only tiles where there is at least one label in the category. Img Mode indicates whether the category is used in both image modes or just one: (a) some slow-changing categories are excluded when using low-resolution images because they are not visible; and (b) dynamic categories are always labeled in only one image type. The use cases listed in the last column are discussed further in the next section.

## A.2. Use Cases

We now detail the potential use cases and practical applications of SATLASPRETRAIN categories. We organize our discussion around the use cases that appear in the “use case” column in Table 1 on the preceding page.

**Land Cover.** Land cover and land use maps describe a combination of the earth’s surface material (e.g., trees, water, asphalt, or ice) and how the land is used by humans (e.g., developed areas versus uninhabited areas). We process the WorldCover map [6] to derive 11 land cover and land use categories, ranging from barren land to developed areas. Tracking changes in land cover has numerous applications, such as monitoring urban expansion, monitoring deforestation, and identifying growing and receding water bodies.

**Timestamped Coastline.** We use Amazon Mechanical Turk to annotate 10K images for the current coastline contour visible in each image. While land cover maps include a category for water bodies, they focus on a long time horizon, labeling water based on the mean high water level (i.e., the average level of water at high tide). The actual water level can vary greatly both through the tide cycle and over seasonal changes. For the timestamped coastline, we instead label the water level apparent from NAIP images captured at particular times. Current water levels are of interest to earth and environmental scientists, while the contours themselves can improve accuracy for detecting coastal features like near-shore vessels and platforms.

**Crop Type.** We derive crop type labels from OpenStreetMap. In 20K images, we process 16 crop type categories: rice, grape, corn, sugarcane, tea, hop, wheat, soy, barley, oats, rye, cassava, potato, sunflower, asparagus, and coffee. Crop type mapping is useful for both environmental monitoring and food price prediction.

**Wildfire.** We use Amazon Mechanical Turk to annotate 10K images for three wildfire-related categories in Sentinel-2 images: fire retardant drops, burned areas, and smoke presence. Automated methods for these categories can help inform both real-time fire response efforts, and longer-term forest management practices. Fire retardant is a substance dropped along the boundaries of a wildfire to contain or slow its progression. We define burned areas as grass or tree covered areas recently burned within the last three months of the current image. Note that we pick windows for annotation by selecting ones containing polygons from the National Interagency Fire Center historic perimeters.

**Flood and Cloud Labels.** We derive flood and cloud labels from C2S [1]. Cloud labels can improve performance on other categories by helping the model learn which parts of the image are occluded by clouds or cloud shadows. Real-time flood mapping is critical for coordinating disaster relief efforts.

**Bathymetry.** We process coastal bathymetry lidar scans from NOAA to derive bathymetry (water depth) data. Prior work has shown that water depth (bathymetry) up to around 10 m can be measured from optical satellite images [2]. Coastal bathymetry has several applications, including near-shore ship navigation and for monitoring changes in water reservoir volumes.

**Tree Cover.** Two domain experts on our team annotate tree cover canopy percentage in 3K images. Tree cover data can capture forest growth and loss on a more fine-grained scale than land cover maps. For example, consider a scenario where forest density is reduced due to selective logging, where many trees are cut but many others are left intact. This would not constitute a change in land cover, since the region is still tree-covered. However, the density reduction would still be captured by a change in tree cover canopy percentage.

**Digital Map Features.** We derive labels for digital map features like buildings, roads, and parking lots from OpenStreetMap. Automatically detecting features that are missing from digital maps can reduce the cost of improving those maps, along with the cost of keeping those maps up-to-date with changes in the real world.

**Infrastructure.** We derive labels for various energy and water infrastructure like power substations, wind turbines, oil wells, wastewater plants from OpenStreetMap. We also use Amazon Mechanical Turk to label rooftop solar panels, which are not accurately mapped in existing datasets due to their recent rapid growth. Similarly, two domain experts label off-shore platforms and off-shore wind turbines. Monitoring these features is useful for tracking renewable energy deployment progress, or for evaluating the environmental and public health impacts of activities like oil drilling.

**Airplanes and Vessels.** We use Amazon Mechanical Turk to label airplanes in NAIP images, and two domain experts on our team label vessels in Sentinel-2 images. Vessel detection in satellite images has recently attracted interest because it is useful for tackling illegal fishing [5]: for example, systems can alert authorities if they detect vessels with visible fishing equipment in marine protected areas.

**Properties.** We derive labels for 12 properties from OpenStreetMap. Five are numerical: the rotor diameter and electricity output of a wind turbine, the capacity of a parking lot, and the number of lanes and maximum speed of a road. The other seven are categorical, and span 35 categories: the type of a sports track (e.g. running, cycling), the type of a road (e.g. motorway, residential street), the type of a park (e.g. city park, sports pitch), the type of a power plant (e.g. oil, nuclear), the material produced by a quarry (e.g. sand, gravel), and the presence of a bridge on a road (binary).

**Snow.** Two domain experts on our team label the degree of snow accumulation (none, some, and substantial) in

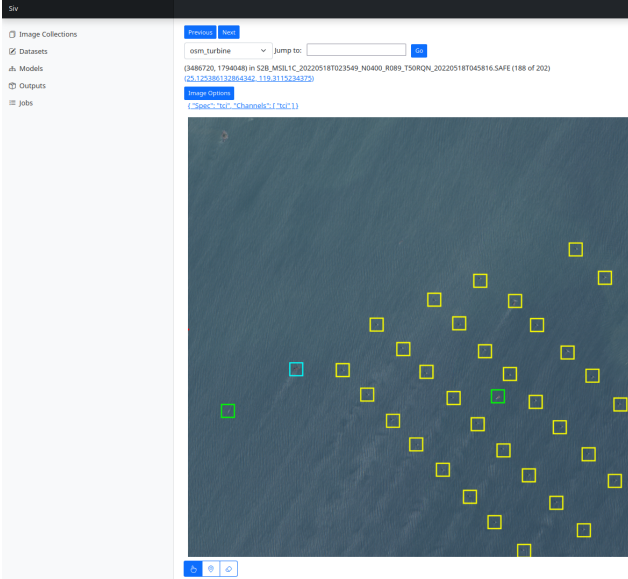

Figure 3: An overview of our annotation tool called Siv.

Sentinel-2 images. Tracking snow accumulation over time is useful for climate forecasting. In cities, monitoring snow accumulation and removal by plowing is useful for identifying and addresses biases in the deployment of snow plowing resources.

### A.3. New Annotation

We label 12 categories with expert annotation and 9 categories with Amazon Mechanical Turk (AMT). To facilitate this annotation, we developed a dedicated annotation tool called Siv. A key feature of Siv is that it is highly customizable; this way, when a particular SATLASPRETRAIN category presents unique challenges that require a tailored interface to address, we can deploy Siv in an updated configuration for that category.

Below, we first detail Siv and the per-category customizations that we made to it for various categories. Then, for the categories that we annotated using AMT, we detail the number of workers we asked to label each tile.

#### A.3.1 Siv

We show a screenshot from Siv in Figure 3. The annotation interface displays a window of a remote sensing image, with current labels for the window overlaid on top (here, vessels are in green, offshore platforms in cyan, and offshore wind turbines in yellow). Metadata about the window, including its timestamp and longitude-latitude coordinates, are shown at the top. Users can press the longitude-latitude coordinates to view a list of images captured at the same location, or to view Google Maps or OpenStreetMap at that position. Users can also press Image Options to adjust the

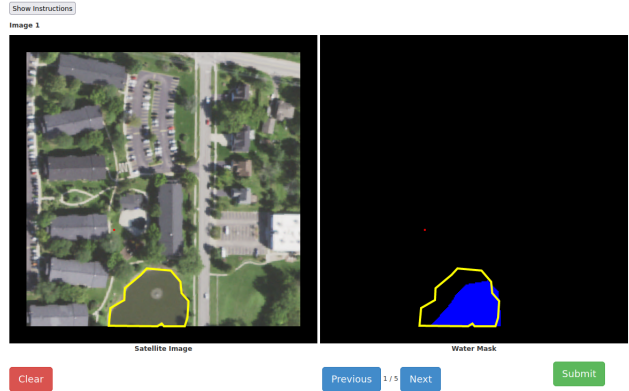

Figure 4: We include a water mask derived from OpenStreetMap when labeling the timestamped coastline.

contrast of the image. The toolbar at the bottom allows toggling between selecting labels, adding labels, and removing labels. The type of label is configured outside of the web interface: Siv supports annotating points, polygons, polylines, and segmentation labels.

For AMT, we use a lighter and less cluttered version of Siv that lacks features like the per-window timestamp and coordinate metadata. We also include instructions that provide guidance on how the images should be labeled, and examples of different types of labels.

We make customizations to Siv for each category that we use it for, in order to maximize annotation quality. We detail these customizations below.

**Timestamped Coastline.** We found that, initially, AMT workers were occasionally not able to distinguish water bodies from other objects like marshes due to similar appearance in the NAIP imagery and a lack of experience with those images. Since our focus here was on labeling the coastline at a particular point in time, and not identifying previously unknown water bodies, we decided to include a water mask from OpenStreetMap that shows roughly where the water bodies are. This helped focus the workers on the water bodies intersecting the tile covered by the image. We show an example in Figure 4. Note that we pick windows for annotation by selecting ones that contain at least 20% water and at least 20% land, based on the OpenStreetMap-derived water mask.

**Airplanes.** We find that no customizations are needed for annotating airplanes accurately. We show an example in Figure 5. Note that we pick windows for annotation by selecting ones intersecting airports in OpenStreetMap.

**Off-shore Platform, Off-shore Wind Turbines, and Vessels.** For these categories, we find that it is useful to compare multiple images of the same location to distinguish moving objects like vessels from static objects like platforms and wind turbines. Thus, we customize Siv to enable



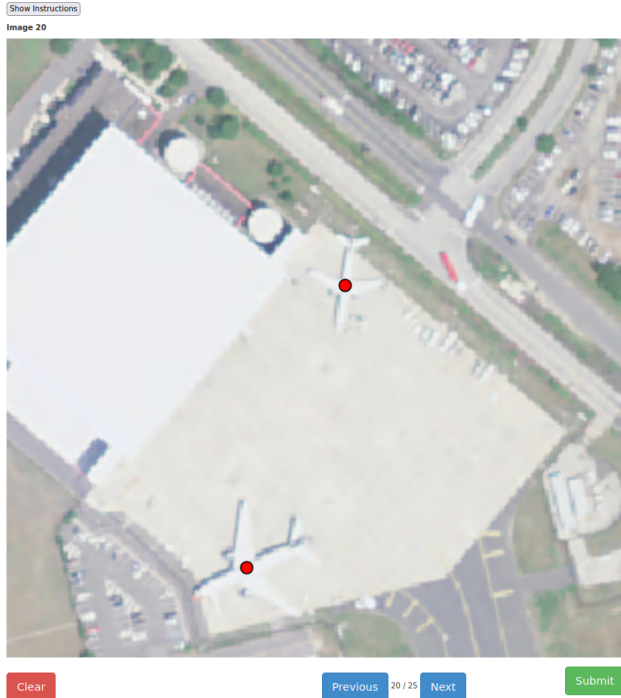

Figure 5: Interface for annotating airplanes. We include instructions telling AMT workers to label the point at which the wings connect with the fuselage.

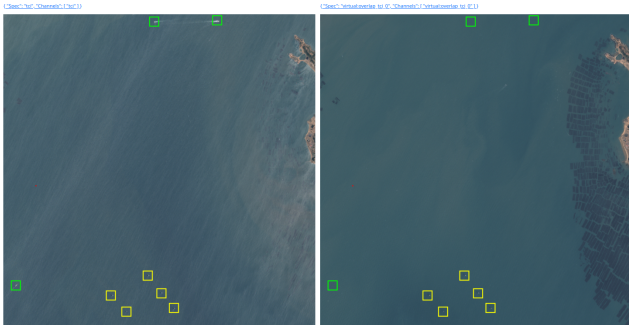

Figure 6: When labeling off-shore platforms and off-shore wind turbines, we customize Siv so that the arrow keys can be used to toggle between current (left) and historical (right) images.

domain experts to use the arrow keys to toggle between the current image that is being labeled and historical images of the same location. We show an example of this in Figure 6. Note that we pick windows for annotation by selecting ones containing wind turbines and platforms in OpenStreetMap, USGS Wind Turbine Database, or HIFLD Oil and Natural Gas Platforms Database.

**Fire Retardant.** Although fire retardant drops are visible in individual Sentinel-2 images, we find that including a his-

| Category                | Workers |
|-------------------------|---------|
| Airplane                | 1       |
| Rooftop Solar Panel     | 3       |
| Timestamped Coast Water | 3       |
| Timestamped Coast Land  | 3       |
| Burned Area             | 3       |
| Fire Retardant          | 3       |
| Smoke (None)            | 3       |
| Smoke (Low)             | 3       |
| Smoke (High)            | 3       |

Table 2: The number of different AMT workers that annotated each tile for different SATLASPRETRAIN categories.

torical image of the same location from a few months before a recorded wildfire is helpful to improve accuracy at localizing the fire retardant drops. We show an example in Figure 7.

**Smoke.** We find that adding a historical image is helpful for annotating smoke presence as well. We show an example in Figure 8.

**Burned Areas.** We reuse the historical image display from fire retardant and smoke labeling discussed above. However, we find that burned areas are still often difficult to distinguish. Based on feedback from domain experts, we find that infrared channels captured by Sentinel-2 can provide a clearer indication of vegetation loss than the visible light RGB channels. Thus, we include an infrared image in the interface. Since we label burned areas using AMT, we include additional instructions in the interface discussing how the infrared image should be interpreted. We show an example in Figure 9.

**Tree Cover.** We originally tried to label contours of different tree cover densities in NAIP images. However, we determined that ambiguity in the exact position of the contour made it difficult to annotate the data in this way. Instead, we decided to have domain experts label the tree cover within a square overlaid on the NAIP image. We show an example in Figure 10.

### A.3.2 Worker Parallelism

For each category in SATLASPRETRAIN that we annotated using Amazon Mechanical Turk workers, in Table 2, we show the number of workers that we asked to annotate each tile. When the number of workers is greater than one, we compute the final labels by performing majority voting over the multiple workers.

We decided the number of workers needed per tile on a per-category basis, by first having one worker annotate each tile, and then analyzing the label quality. For example, we found that airplanes were unambiguous enough that a

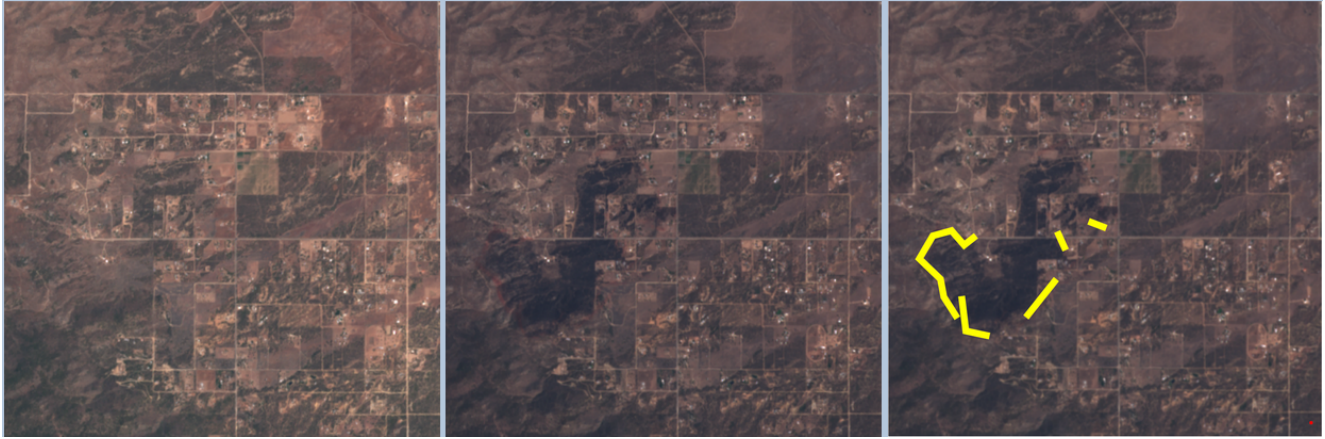

Figure 7: Interface for annotating fire retardant. It displays an image from roughly three months before a wildfire event on the left, and an image during or after the event in the middle.

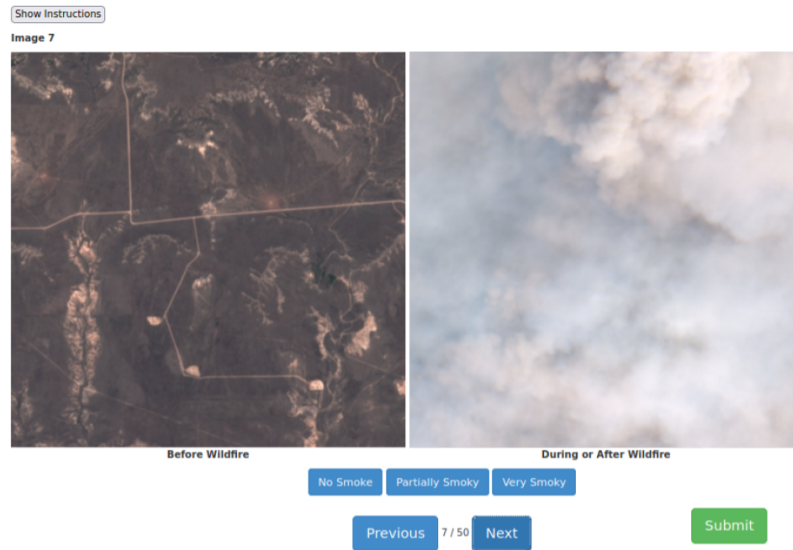

Figure 8: Interface for annotating smoke presence in Sentinel-2 images.

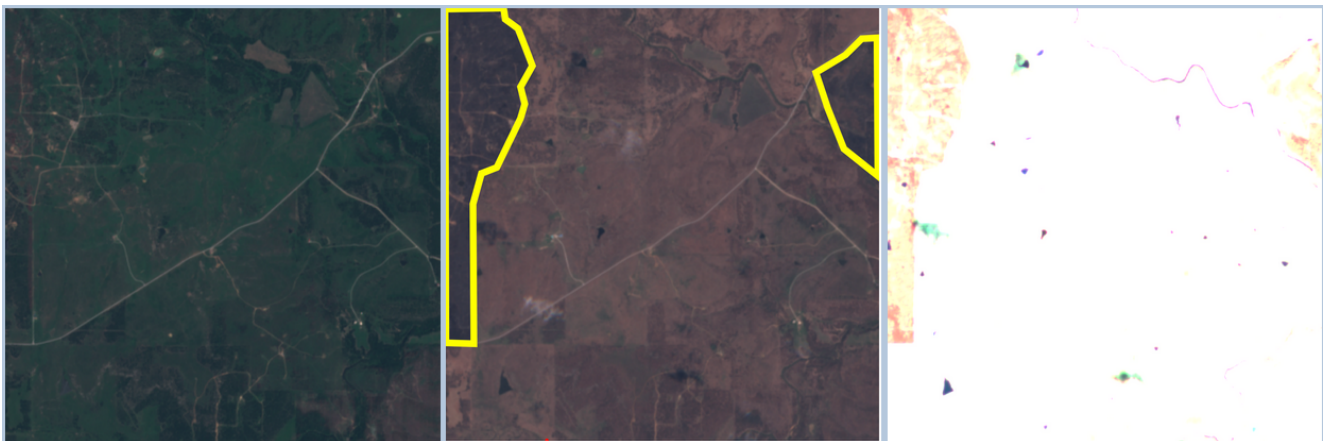

Figure 9: Interface for annotating burned areas. It displays a historical image on the left, an RGB image during or after the wildfire event in the middle, and an infrared image during or after the wildfire event on the right.

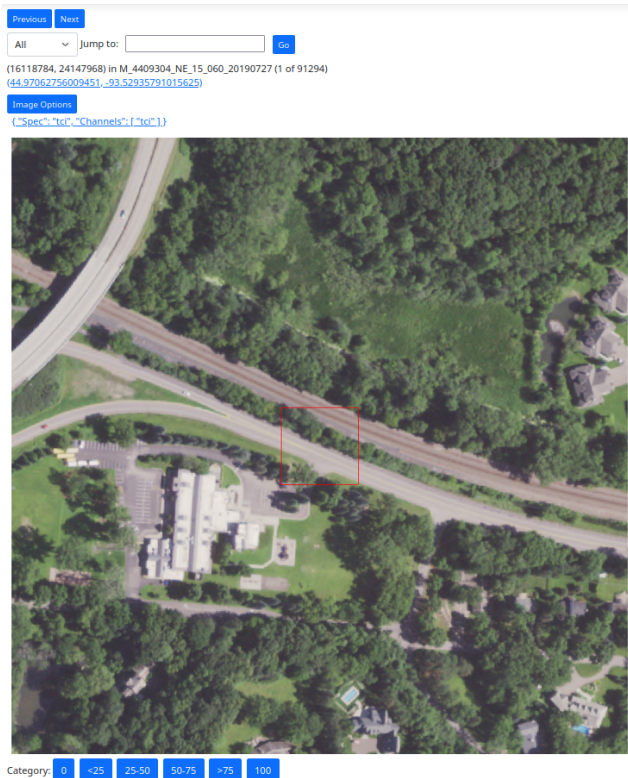

Figure 10: Interface for annotating tree cover. We show a red square at the center of the image, and ask domain experts to label the tree cover canopy percentage within the square. The portions of the image surrounding the square provide useful context about the region being visualized.

single worker was sufficient, while we had three workers label each tile for areas burned by wildfires.

## A.4. OpenStreetMap Processing

### A.4.1 Heuristics for Accurate Processing

OpenStreetMap is a collaborative map dataset. It consists of features that specify longitude and latitude coordinates. These features may be points (one longitude-latitude coordinate), ways (a sequence of coordinates specifying polylines or polygons), or relations (an ordered list of other features). Each feature can be tagged with arbitrary key-value pairs.

When initially processing OpenStreetMap features to extract labels for SATLASPRETRAIN, we found that the resulting labels exhibited high precision (i.e., there were very few incorrect labels), but at some tiles exhibited low recall. We found that these low-recall tiles typically had few distinct categories mapped in OpenStreetMap, e.g., tiles that only contained roads and buildings were more likely to be missing other features like water towers and power substations. Thus, we experimented with selecting subsets of tiles

|                      |
|----------------------|
| crop                 |
| wind_turbine         |
| aquafarm             |
| lighthouse           |
| lock                 |
| dam                  |
| solar_farm           |
| power_plant          |
| gas_station          |
| park                 |
| parking_garage       |
| parking_lot          |
| landfill             |
| quarry               |
| mineshaft            |
| stadium              |
| airport              |
| airport_runway       |
| airport_taxiway      |
| airport_apron        |
| airport_hangar       |
| airstrip             |
| airport_terminal     |
| ski_resort           |
| theme_park           |
| storage_tank         |
| silo                 |
| track                |
| raceway              |
| wastewater_plant     |
| water_park           |
| aerialway_pylon      |
| communications_tower |
| helipad              |
| petroleum_well       |
| water_tower          |
| power_tower          |
| power_substation     |

Table 3: List of “rarer” categories in OpenStreetMap that we use to select tiles for processing. We only collect labels from OpenStreetMap for a tile if there is at least one feature in OpenStreetMap in at least one of these categories contained in that tile.

by using various heuristics about the distinct categories appearing in a tile.

We found that the simple strategy of picking only tiles with “rarer” categories was highly effective: if a tile contains a wind turbine, it is most likely well mapped and has good coverage of all the other categories that we derive from OpenStreetMap. Thus, in our final processing, we only extract labels from OpenStreetMap for tiles with at least one

| Category     | Rule                         |
|--------------|------------------------------|
| storage_tank | No tag location=underground. |
| road         | No tag tunnel=yes.           |
| railway      | No tag tunnel=yes.           |
| railway      | No tag railway=abandoned.    |

Table 4: List of rules we use to exclude OpenStreetMap features that do not correspond to visible physical objects. We organize the rules by category.

| Category         | # Detections | # New Labels |
|------------------|--------------|--------------|
| Chimney          | 498          | 0            |
| Fountain         | 2626         | 882          |
| Gas Station      | 137          | 96           |
| Helipad          | 699          | 39           |
| Parking Garage   | 149          | 55           |
| Parking Lot      | 7220         | 101          |
| Petroleum Well   | 1602         | 148          |
| Pier             | 180          | 0            |
| Power Substation | 71           | 5            |
| Silo             | 99           | 8            |
| Storage Tank     | 167          | 43           |
| Toll Booth       | 1449         | 0            |
| Water Tower      | 447          | 3            |

Table 5: Remaining low-recall categories for which we performed additional annotation in the test set. We show the number of detections we went through, and the number of additional labels we added to SATLASPRETRAIN.

feature under one of the categories in Table 3.

We also incorporated several rules to exclude OpenStreetMap features that did not correspond to physical objects visible from remote sensing images. We enumerate these rules in Table 4.

#### A.4.2 Additional Test Set Annotation

Although the heuristics described above improve the recall of most categories in the dataset to higher than 95%, we find that 13 categories derived from OpenStreetMap still have low recall. We list the categories in Table 5. From an analysis of 1300 tiles, we determined that recall was still at least 80% for these categories, which we deemed sufficient for the training set: there are methods for learning from sparse labels, and large-scale training on noisy labels has produced models like CLIP that deliver state-of-the-art performance. We show the results of this analysis in Section A.5 below. However, we deemed that these 13 categories did not have sufficient recall for the test set.

Thus, to ensure a highly accurate test set, for each of these 13 categories, we trained an initial model on OSM labels and tuned its confidence threshold for high-recall low-

precision detection; we then hand-labeled its predictions to add missing labels to the test set. For each of these categories, we list the number of detections we went through and the number that we added to the dataset in Table 5.

#### A.5. Accuracy Analysis

We perform an accuracy analysis of all 137 categories in the final SATLASPRETRAIN training set. For each category, we uniformly randomly sample 100 positive labels, and ask two domain experts to annotate the correctness of each label, i.e., (a) for slow-changing categories, whether the label is consistent with the most recent image at the tile; and (b) for dynamic categories, whether the label is consistent with the image that the label references. For the three categories with fewer than 100 labels (see Table 1), we use all the labels. For point, polygon, and polyline categories, we also uniformly randomly sample 100 images where the label is valid but not present, and ask domain experts to determine whether each image contains any missing labels under the category. For the other categories, tiles with missing labels are not well-defined; for example, for a group of classification categories like Smoke Presence, missing labels in “Smoke—None” are captured in the incorrect labels of the associated categories “Smoke—Low” and “Smoke—High”.

We report the results of this analysis in Table 6. Overall, the analysis demonstrates that labels in SATLASPRETRAIN are highly accurate, with 116/137 categories having >99% precision and 131/137 categories having >95% precision. Labels like Offshore Wind Turbine and Tree Cover that were annotated by domain experts are consistently high-accuracy, showing that expert annotation is crucial for getting the best annotation quality. Labels derived from properties of OpenStreetMap features are also consistently high in quality, likely because contributors only tag the properties at features where they know the value; as a result, though, there may be geographical biases in where the property values are tagged.

Note that the missing tiles percentage is different from recall, which measures the fraction of actual labels that are covered by SATLASPRETRAIN labels. Instead, if a category is missing labels in  $M\%$  of tiles with  $m$  missing labels per tile, and is present in SATLASPRETRAIN in  $P\%$  of tiles with  $p$  existing labels per tile (with an assumption that there are no missing labels in the tiles where the category is labeled at least once), then the recall is  $\frac{Pp}{Pp+Mm}$ . Thus, one limitation of the analysis above is that the missing tiles percentage does not provide an accurate estimate of recall for categories that appear in fewer than 1% of tiles. However, obtaining a more accurate recall estimate for these categories would require analyzing far more than 100 negative tiles, which is cost-prohibitive with the number of categories in SATLASPRETRAIN.

| Category               | Precision | Missing Tiles |
|------------------------|-----------|---------------|
| Aquafarm               | 100       | 0             |
| Lock                   | 100       | 0             |
| Dam                    | 100       | 0             |
| Solar Farm             | 97        | 0             |
| Power Plant            | 100       | 0             |
| Gas Station            | 100       | 1             |
| Park                   | 100       | 0             |
| Parking Garage         | 100       | 1             |
| Parking Lot            | 100       | 5             |
| Landfill               | 100       | 0             |
| Quarry                 | 100       | 0             |
| Stadium                | 100       | 0             |
| Airport                | 100       | 0             |
| Airport Apron          | 100       | 0             |
| Airport Hangar         | 100       | 0             |
| Airport Terminal       | 100       | 0             |
| Ski Resort             | 100       | 0             |
| Theme Park             | 100       | 0             |
| Storage Tank           | 100       | 0             |
| Silo                   | 100       | 0             |
| Track                  | 100       | 0             |
| Wastewater Plant       | 99        | 0             |
| Power Substation       | 100       | 0             |
| Pier                   | 99        | 0             |
| Crop Field             | 100       | 0             |
| Building               | 100       | 0             |
| Wind Turbine           | 91        | 0             |
| Lighthouse             | 98        | 0             |
| Mineshaft              | 100       | 0             |
| Aerialway Pylon        | 95        | 0             |
| Helipad                | 99        | 0             |
| Fountain               | 96        | 0             |
| Toll Booth             | 99        | 0             |
| Chimney                | 99        | 0             |
| Communications Tower   | 80        | 0             |
| Flagpole               | 100       | 0             |
| Petroleum Well         | 99        | 0             |
| Water Tower            | 100       | 0             |
| Offshore Wind Turbine  | 100       | 0             |
| Offshore Platform      | 100       | 0             |
| Power Tower            | 98        | 0             |
| Airplane               | 100       | 0             |
| Rooftop Solar Panel    | 98        | 0             |
| Vessel                 | 98        | 0             |
| Airport Runway         | 100       | 0             |
| Airport Taxiway        | 100       | 0             |
| Raceway                | 100       | 0             |
| Road                   | 100       | 1             |
| Railway                | 100       | 0             |
| River                  | 100       | 0             |
| Land Cover - Water     | 96        | -             |
| Land Cover - Developed | 100       | -             |
| Land Cover - Tree      | 99        | -             |
| Land Cover - Shrub     | 96        | -             |
| Land Cover - Grass     | 100       | -             |
| Land Cover - Crop      | 96        | -             |
| Land Cover - Bare      | 94        | -             |
| Land Cover - Snow      | 96        | -             |
| Land Cover - Wetland   | 99        | -             |

Table 6: Accuracy analysis of Satlas categories. Precision indicates the percentage of labels that are correct, as determined by two domain experts based on 100 positive labels. Missing Tiles indicates the percentage of tiles with missing labels, based on 100 negative tiles.

| Category                      | Precision | Missing Tiles |
|-------------------------------|-----------|---------------|
| Land Cover - Mangroves        | 100       | -             |
| Land Cover - Moss             | 100       | -             |
| Crop Type - Rice              | 100       | -             |
| Crop Type - Grape             | 100       | -             |
| Crop Type - Corn              | 100       | -             |
| Crop Type - Sugarcane         | 100       | -             |
| Crop Type - Tea               | 100       | -             |
| Crop Type - Hop               | 100       | -             |
| Crop Type - Wheat             | 100       | -             |
| Crop Type - Soy               | 100       | -             |
| Crop Type - Barley            | 100       | -             |
| Crop Type - Oats              | 100       | -             |
| Crop Type - Rye               | 100       | -             |
| Crop Type - Cassava           | 100       | -             |
| Crop Type - Potato            | 100       | -             |
| Crop Type - Sunflower         | 100       | -             |
| Crop Type - Asparagus         | 100       | -             |
| Crop Type - Coffee            | 100       | -             |
| Coast - Water                 | 98        | -             |
| Coast - Land                  | 100       | -             |
| Burned Area                   | 96        | -             |
| Fire Retardant                | 86        | -             |
| Flood                         | 100       | -             |
| Cloud                         | 95        | -             |
| Bathymetry                    | 100       | -             |
| Tree Cover - None             | 100       | -             |
| Tree Cover - Sparse           | 100       | -             |
| Tree Cover - Low              | 100       | -             |
| Tree Cover - Medium           | 100       | -             |
| Tree Cover - High             | 100       | -             |
| Tree Cover - Full             | 100       | -             |
| Wind Turbine - Rotor Diameter | 100       | -             |
| Wind Turbine - Power          | 100       | -             |
| Parking Lot - Capacity        | 100       | -             |
| Track - Running               | 100       | -             |
| Track - Cycling               | 100       | -             |
| Track - Horse                 | 100       | -             |
| Road Type - Motorway          | 100       | -             |
| Road Type - Trunk             | 100       | -             |
| Road Type - Primary           | 100       | -             |
| Road Type - Secondary         | 100       | -             |
| Road Type - Tertiary          | 100       | -             |
| Road Type - Residential       | 100       | -             |
| Road Type - Service           | 100       | -             |
| Road Type - Track             | 100       | -             |
| Road Type - Pedestrian        | 100       | -             |
| Road - Number of Lanes        | 100       | -             |
| Road - Max Speed              | 100       | -             |
| Road - Bridge                 | 100       | -             |
| Road - Not Bridge             | 100       | -             |
| Power Plant - Oil             | 100       | -             |
| Power Plant - Nuclear         | 100       | -             |
| Power Plant - Coal            | 100       | -             |
| Power Plant - Gas             | 100       | -             |
| Quarry - Sand                 | 100       | -             |
| Quarry - Gravel               | 100       | -             |
| Quarry - Clay                 | 100       | -             |
| Quarry - Coal                 | 100       | -             |
| Quarry - Peat                 | 100       | -             |

Table 6 (continued): Accuracy analysis of Satlas categories. Precision indicates the percentage of labels that are correct, as determined by two domain experts based on 100 positive labels. Missing Tiles indicates the percentage of tiles with missing labels, based on 100 negative tiles.

| Category                       | Precision | Missing Tiles |
|--------------------------------|-----------|---------------|
| Park Type - City Park          | 100       | -             |
| Park Type - Pitch              | 100       | -             |
| Park Type - Golf Course        | 100       | -             |
| Park Type - Cemetery           | 100       | -             |
| Park Sport - American Football | 100       | -             |
| Park Sport - Badminton         | 100       | -             |
| Park Sport - Baseball          | 100       | -             |
| Park Sport - Basketball        | 100       | -             |
| Park Sport - Cricket           | 100       | -             |
| Park Sport - Rugby             | 100       | -             |
| Park Sport - Soccer            | 100       | -             |
| Park Sport - Tennis            | 100       | -             |
| Park Sport - Volleyball        | 100       | -             |
| Snow - None                    | 100       | -             |
| Snow - Partial                 | 100       | -             |
| Snow - Full                    | 100       | -             |
| Smoke - None                   | 97        | -             |
| Smoke - Low                    | 94        | -             |
| Smoke - High                   | 92        | -             |

Table 6 (continued): Accuracy analysis of Satlas categories. Precision indicates the percentage of labels that are correct, as determined by two domain experts based on 100 positive labels. Missing Tiles indicates the percentage of tiles with missing labels, based on 100 negative tiles.

## A.6. Test Split Selection

We first chose test split sizes so that refinement annotation would be feasible (see A.4.2). However, this restriction results in small test sizes, especially for the high-res image mode which has categories that require refinement. Then, due to the small test split size relative to total dataset size, randomly sampling the test split would yield too few examples in rare categories. Thus, for each rare category we randomly sampled 4 tiles for high-res and 128 tiles for low-res containing that category, and added these tiles to the test splits. This provided  $\sim 1/4$  of the desired test tiles; we randomly sampled the rest without constraints.

## B. Downstream Experiments

### B.1. Training Details

We provide additional details about training and fine-tuning for the downstream experiments here.

For all runs, when fine-tuning on downstream datasets, we first freeze the backbone and only train the prediction head for 32K examples, and then fine-tune the entire model. After unfreezing the backbone, we increase the learning rate linearly from 0 to  $10^{-4}$  over another 32K examples. We then reduce the learning rate on plateaus in the training loss, down to a minimum of  $10^{-5}$ .

For pre-training on SATLASPRETRAIN and the four dataset baselines, we employ random resizing, random cropping, and horizontal and vertical flipping augmentations. We select the batch size based on the maximum that can be used with NVIDIA A6000 GPU: we use a batch size of 16 for SATLASPRETRAIN DOTA, and iSAID; a batch size of 32 for Million-AID; and a batch size of 64 for BigEarthNet. We use the Adam optimizer, and initialize the learning rate to  $10^{-4}$ , decaying via halving down to  $10^{-6}$  upon plateaus in the training loss. We train until convergence in the training loss.

We use the SeCo weights provided by the authors. We train MoCo on SATLASPRETRAIN with a batch size of 32, for 5 days on 1 NVIDIA Titan X Pascal GPU. For MoCo training, 44x44 chunks are extracted from the original 512x512 images, to replicate the shapes used in the MoCo variant evaluated in the SeCo authors. We fine-tune the weights learned through self-supervision on the downstream tasks.

### B.2. Per-Dataset Results

In Figures 11, 12, 13, and 14, we show performance for SATLASPRETRAIN compared to the four self-supervised and five supervised pre-training methods, on the seven downstream tasks with varying number of training samples. The sizes of the downstream datasets range from 137 to 363,572 training samples, and we choose seven few-shot scenarios in addition to training on the whole set for each

task. In most cases, SATLASPRETRAIN outperforms the other baselines, especially so when fewer training examples are provided.

### B.3. Additional SeCo Variants

In the main paper, we show results for SeCo trained with the authors' model on the authors' dataset, which performs the best. In Table 7, we show results for two additional variants of SeCo that do not perform as well: training their model on SATLASPRETRAIN, and training SeCo with SATLASNET on SATLASPRETRAIN.

Downstream results show that the default SeCo approach usually outperforms the SeCo variants using SATLASPRETRAIN. This is likely because, as stated in the SeCo paper, locations were carefully selected for inclusion in the SeCo dataset to minimize the number of uniform images that show monotonous areas such as oceans and deserts. Since SATLASPRETRAIN includes many such areas, we hypothesize that the model struggles when presented e.g. with images of different ocean areas that look identical to each other. We hypothesize that this also contributes to MoCo SATLASNET on SATLASPRETRAIN not performing well on the downstream tasks.



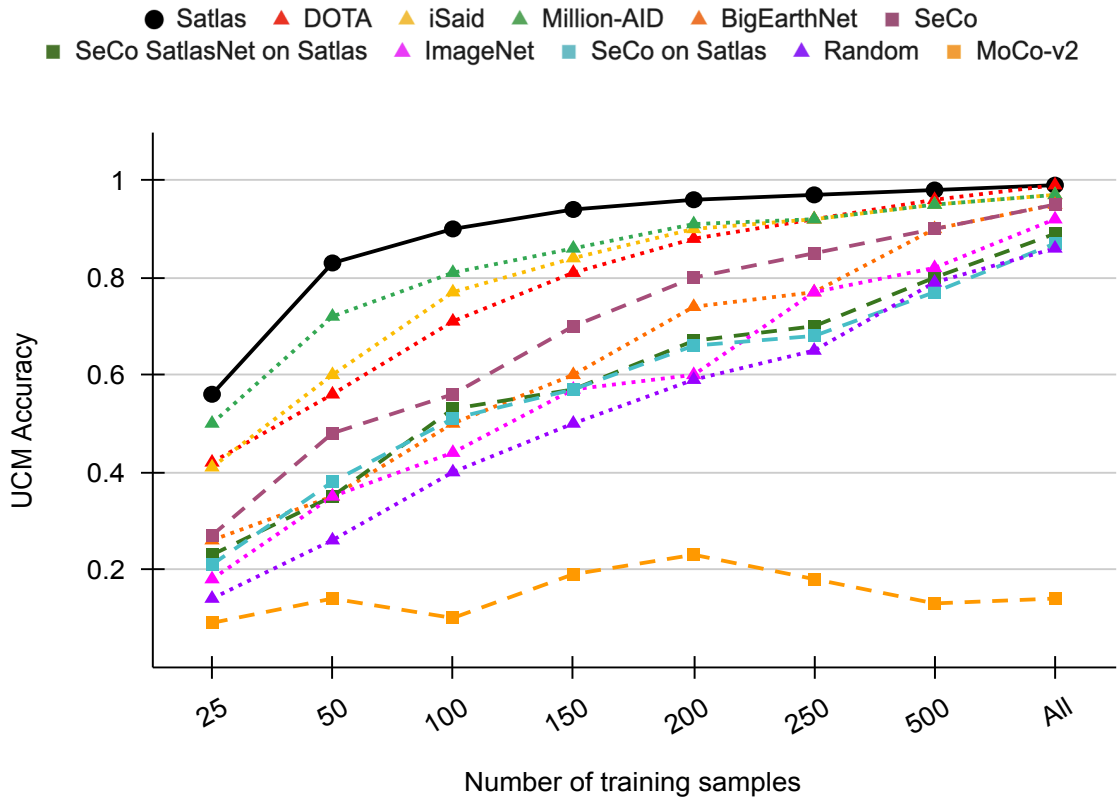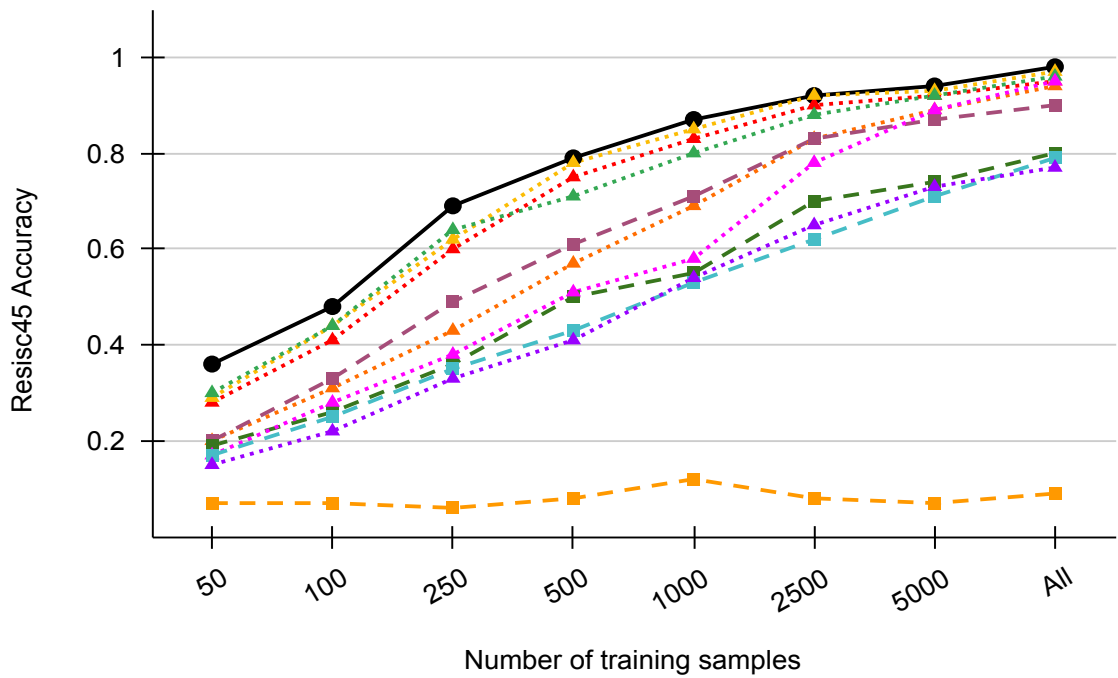

Figure 11

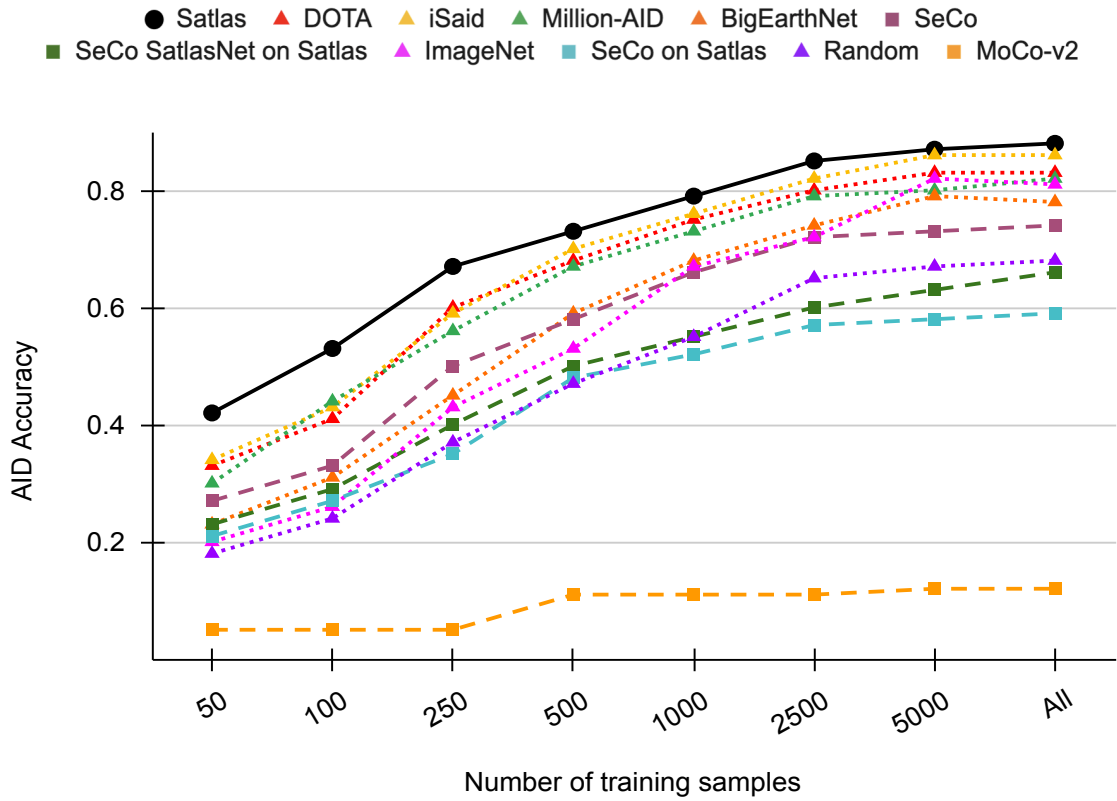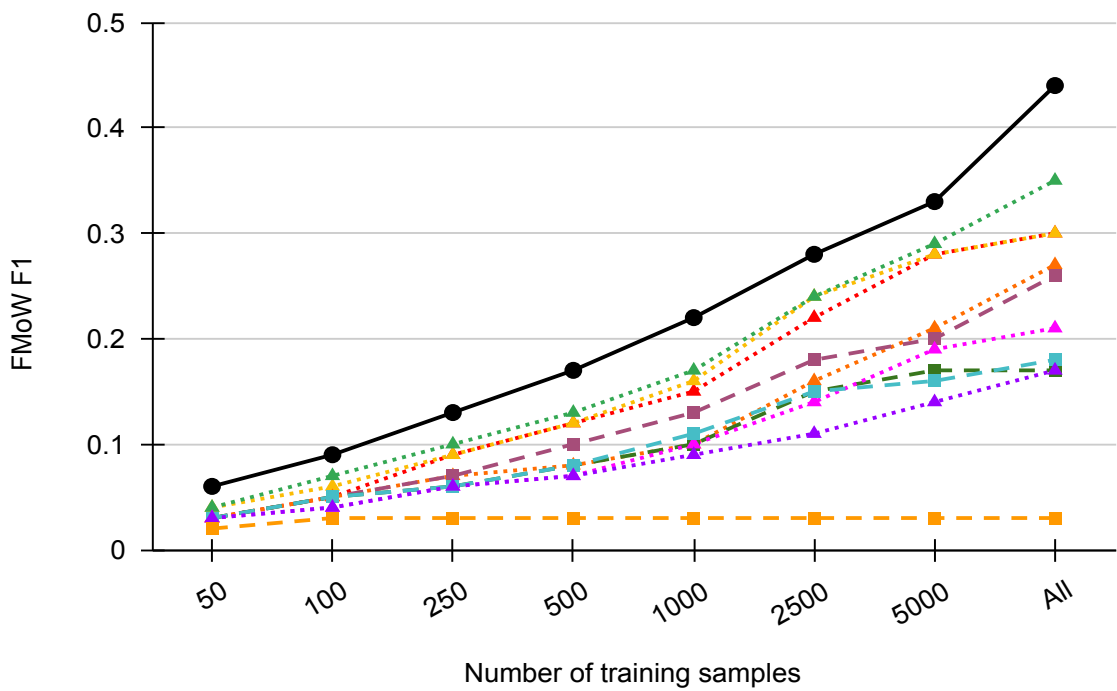

Figure 12

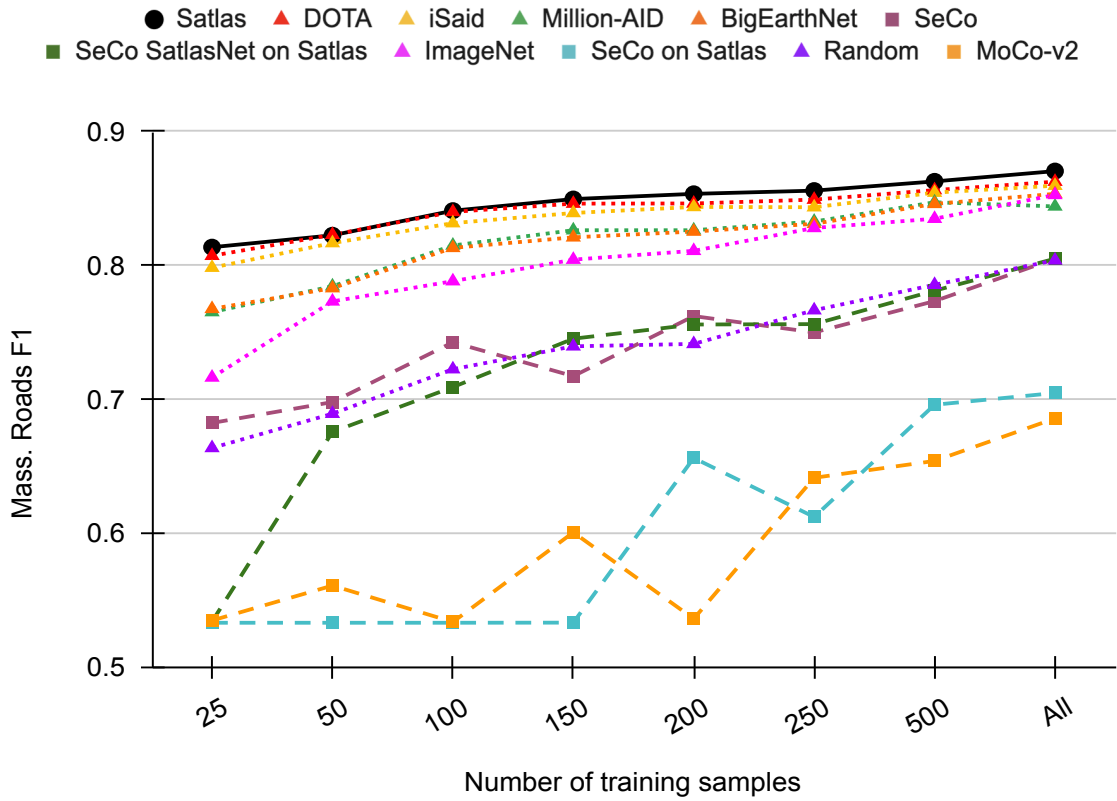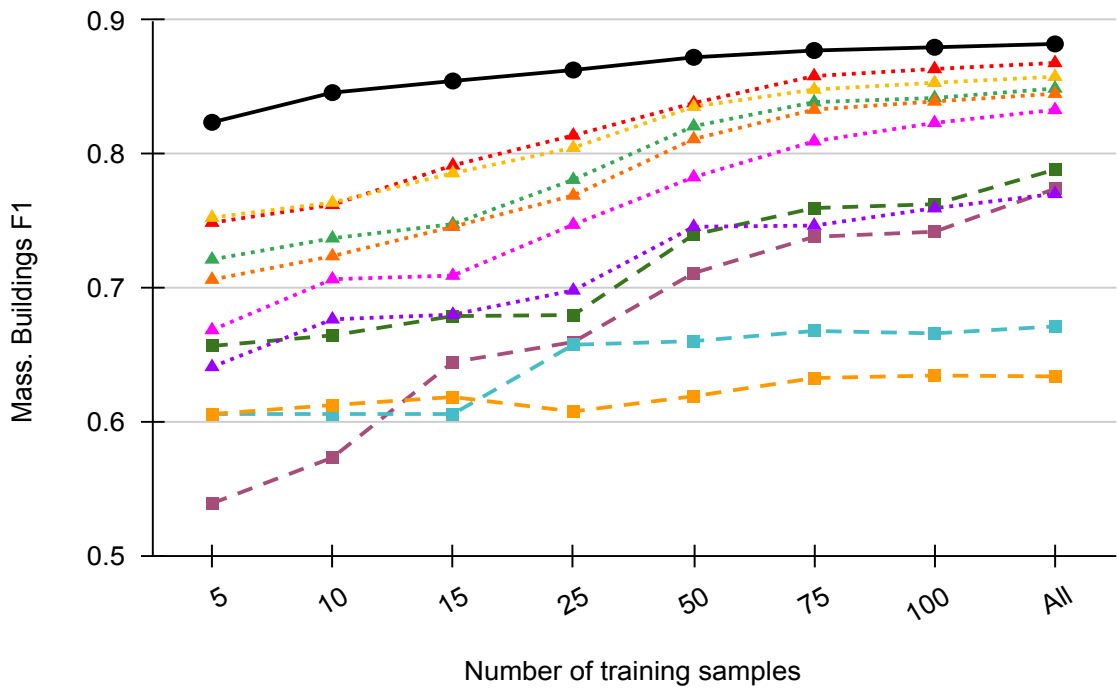

Figure 13

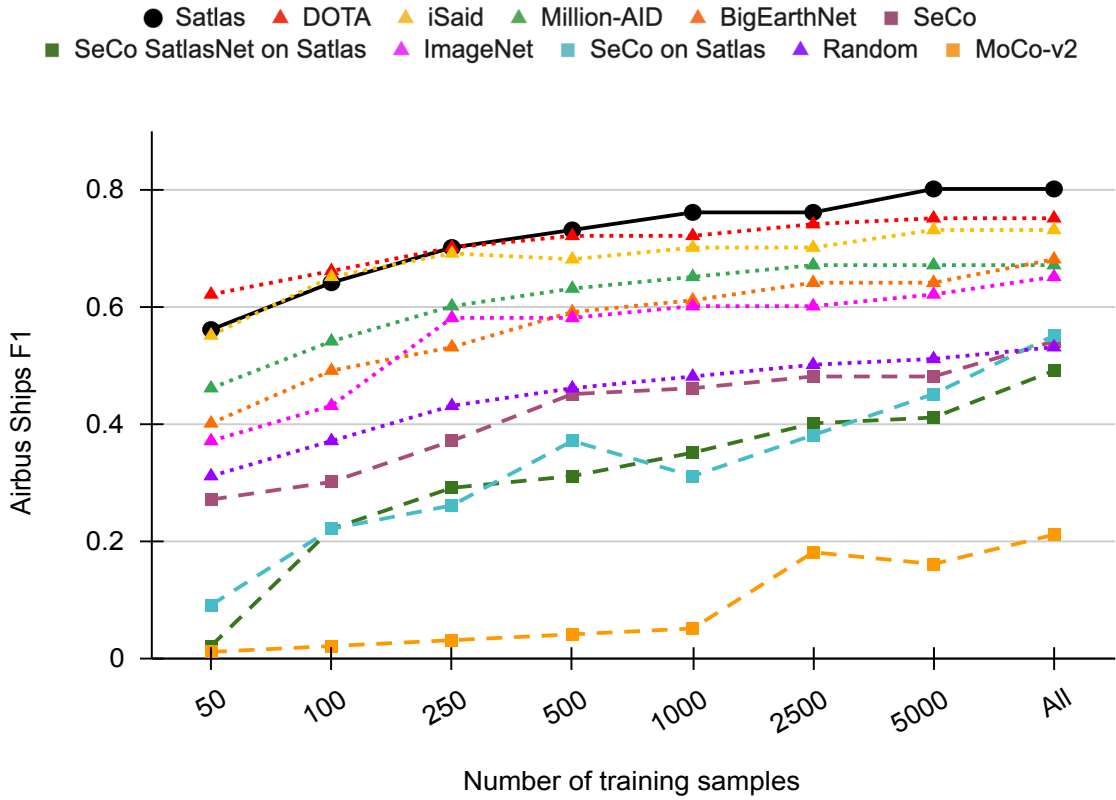

Figure 14

| Method                                | UCM  |      | RESISC45 |      | AID  |      | FMoW |      | Mass Roads |      | Mass Buildings |      | Airbus Ships |      | Average |      |
|---------------------------------------|------|------|----------|------|------|------|------|------|------------|------|----------------|------|--------------|------|---------|------|
|                                       | 50   | All  | 50       | All  | 50   | All  | 50   | All  | 50         | All  | 50             | All  | 50           | All  | 50      | All  |
| MoCo [3]                              | 0.14 | 0.14 | 0.07     | 0.09 | 0.05 | 0.12 | 0.02 | 0.03 | 0.56       | 0.69 | 0.62           | 0.63 | 0.01         | 0.21 | 0.21    | 0.27 |
| SeCo [4]                              | 0.48 | 0.95 | 0.20     | 0.90 | 0.27 | 0.74 | 0.03 | 0.26 | 0.70       | 0.81 | 0.71           | 0.77 | 0.27         | 0.54 | 0.38    | 0.71 |
| SeCo on SatlasPretrain                | 0.38 | 0.87 | 0.17     | 0.79 | 0.21 | 0.59 | 0.03 | 0.18 | 0.53       | 0.71 | 0.66           | 0.67 | 0.09         | 0.55 | 0.30    | 0.62 |
| SeCo on SatlasPretrain with SatlasNet | 0.35 | 0.89 | 0.19     | 0.80 | 0.23 | 0.66 | 0.03 | 0.17 | 0.68       | 0.81 | 0.74           | 0.79 | 0.02         | 0.49 | 0.32    | 0.66 |

Table 7: Results for SeCo variations on seven downstream tasks when fine-tuned with 50 examples (50) or the entire downstream dataset (All). Accuracy is reported for UCM, RESISC45, and AID while F1 Score is reported for FMoW, Mass. Roads, Mass. Buildings, and Airbus Ships.

### C. Multispectral Bands and Sentinel-1 Images

In the experiments in Section 5.1, we use RGB bands of Sentinel-2 only: B4, B3, and B2. In Table 8, we show results when training SATLASNET (single-image, joint) on (a) all 10 and 20 m/pixel bands, i.e., B2, B3, B4, B5, B6, B7, B8, B11, and B12; and (b) the 10 and 20 m/pixel bands other than RGB bands, i.e., B5, B6, B7, B8, B11, and B12. We normalize all values to between 0-1 by dividing the raw 16-bit band values by 8000, except B2, B3, and B4, which we obtain from the 8-bit true-color image product by dividing values by 255.

Results are mixed, with additional bands improving performance on points but actually reducing performance on

segmentation, regression, and polygon categories. For categories annotated using the Sentinel-2 RGB bands, like offshore wind turbines and fire retardant, we suspect that because labeling was done based on RGB only, the extra information carried by the additional bands is not relevant to the labels and thus does not improve accuracy. For other categories, we hypothesize that the additional bands have the potential to improve accuracy, but that more training time and more data may be needed for the model to learn to effectively leverage the additional bands. We suspect that improved model architectures may make it possible to improve accuracy with the additional bands at lower training and/or annotation costs.

At all 856K tiles, in addition to providing Sentinel-2 images, we also include 4 synthetic aperture radar images captured by Sentinel-1 during 2022. Specifically, we include 10 m/pixel Sentinel-1 vh+vv IW GRD images. These images provide information that is complementary to the optical Sentinel-2 images, such as texture of the surface material, since SAR measures backscatter from the surface at each pixel. However, in our experiments we do not use the Sentinel-1 images due to cost (which is especially high for training multi-image SATLASNET). We show an example comparing Sentinel-1 and Sentinel-2 in Figure 15.

| Method                     | Seg $\uparrow$ | Reg $\downarrow$ | Pt $\uparrow$ | Pgon $\uparrow$ | Pline $\uparrow$ | Prop $\uparrow$ | Cls $\uparrow$ |
|----------------------------|----------------|------------------|---------------|-----------------|------------------|-----------------|----------------|
| SatlasNet (RGB only)       | 55.8           | 10.6             | 22.0          | 10.3            | 45.5             | 73.8            | 99             |
| SatlasNet (all bands)      | 52.4           | 12.8             | 24.4          | 8.2             | -                | 67.6            | 99             |
| SatlasNet (all except RGB) | 55.0           | 11.6             | 23.6          | 9.2             | -                | 69.2            | 99             |

Table 8: Results on low-resolution SATLASPRETRAIN test set. We break down results by label type: segmentation (Seg), regression (Reg), points (Pt), polygons (Pgon), polylines (Pline), properties (Prop), and classification (Cls). We show absolute error for Reg (lower is better), and accuracy for the others (higher is better). Polyline accuracy is missing due to a bug in the polyline data during the training of these models.

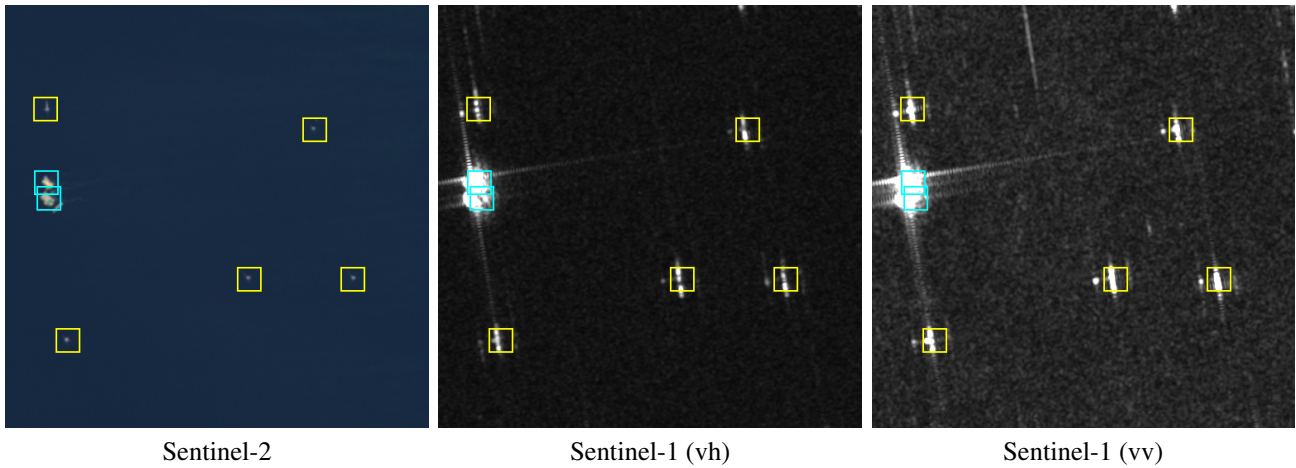

Figure 15: Sentinel-2 and Sentinel-1 images of the same location, with off-shore wind turbines in yellow and off-shore platforms in cyan.

## D. Further Analysis

### D.1. Geographical Biases

In this section, we evaluate the accuracy of SATLASNET on a per-continent level for the point, polygon, segmentation, and property label types. We use single-image, low-res SATLASNET that is fine-tuned on each label type. Since many categories are not present on all continents, we evaluate on 5 point, 13 polygon, 9 segmentation, and 5 property categories, and report the average accuracy across categories for each label type.

We show results in Table 9. While performance varies widely for each label type, the model is more accurate in each geography on some label types and less accurate in others. The results are inconclusive especially because geographies with low coverage in the dataset are correlated with geographies where the task is easiest, since the most large-scale objects tend to be mapped first. For example, a model may be trained on 1K solar farms in A and only 100 in B; one would expect the model to exhibit higher performance in A, but it may instead perform comparably if the solar farms in B are larger on average with smaller solar farms left unlabeled in the dataset.

### D.2. Per-Label-Type Downstream Performance

In this section, we compare downstream performance when training on all label types in SATLASPRETRAIN to training on each individual label type. We do not include classification labels since we pre-train on high-res images for downstream tasks, but SATLASPRETRAIN only contains classification labels for low-res images.

We show results in Table 10. Training on all label types outperforms training on most individual label types, but training on polygon labels performs comparably, indicating that improved pre-training strategies or larger models may further increase downstream performance.

| Region        | Point | Polygon | Segmentation | Property |
|---------------|-------|---------|--------------|----------|
| Africa        | 35.5  | 16.9    | 61.5         | 76       |
| Asia          | 21.2  | 17.5    | 60.1         | 79       |
| Europe        | 22.8  | 17.6    | 56.4         | 75       |
| North America | 25.2  | 20.5    | 59.8         | 79       |
| South America | 30.0  | 16.9    | 61.1         | 75       |
| Oceania       | 40.0  | 24.2    | 54.6         | 79       |

Table 9: Per-continent accuracy of single-image, low-res SatlasNet on four label types.

|                | Point |       | Polygon |       | Polyline |       | Property |       | Regression |       | Segmentation |       | All   |       |
|----------------|-------|-------|---------|-------|----------|-------|----------|-------|------------|-------|--------------|-------|-------|-------|
|                | 50    | 100   | 50      | 100   | 50       | 100   | 50       | 100   | 50         | 100   | 50           | 100   | 50    | 100   |
| UCM            | 0.664 | 0.985 | 0.822   | 0.995 | 0.769    | 0.994 | 0.637    | 0.979 | 0.348      | 0.870 | 0.708        | 0.988 | 0.831 | 0.994 |
| AID            | 0.392 | 0.882 | 0.411   | 0.878 | 0.406    | 0.875 | 0.334    | 0.835 | 0.208      | 0.744 | 0.395        | 0.866 | 0.424 | 0.876 |
| R45            | 0.307 | 0.969 | 0.323   | 0.969 | 0.356    | 0.972 | 0.296    | 0.950 | 0.157      | 0.866 | 0.295        | 0.962 | 0.358 | 0.976 |
| FMoW           | 0.101 | 0.510 | 0.108   | 0.482 | 0.104    | 0.515 | 0.102    | 0.467 | 0.088      | 0.372 | 0.104        | 0.510 | 0.055 | 0.437 |
| Mass Buildings | 0.835 | 0.864 | 0.871   | 0.883 | 0.849    | 0.871 | 0.814    | 0.844 | 0.799      | 0.836 | 0.839        | 0.858 | 0.872 | 0.882 |
| Mass Roads     | 0.817 | 0.858 | 0.834   | 0.864 | 0.857    | 0.872 | 0.807    | 0.847 | 0.750      | 0.841 | 0.799        | 0.862 | 0.823 | 0.871 |
| Ships          | 0.503 | 0.805 | 0.530   | 0.826 | 0.496    | 0.814 | 0.4290   | 0.780 | 0.346      | 0.747 | 0.452        | 0.791 | 0.559 | 0.799 |

Table 10: Downstream performance with 50 and 100 downstream examples, comparing pre-training on individual label types in SATLASPRETRAIN against simultaneously pre-training on all label types.



## **E. Per-Category SATLASPRETRAIN Examples**

On the following pages, we show example labels and SATLASNET predictions for each category in SATLASPRETRAIN, grouped by label type.

**Points**

|                     | Image                                                                               | Ground Truth                                                                        | Predictions                                                                         | Image                                                                                | Ground Truth                                                                          | Predictions                                                                           |
|---------------------|-------------------------------------------------------------------------------------|-------------------------------------------------------------------------------------|-------------------------------------------------------------------------------------|--------------------------------------------------------------------------------------|---------------------------------------------------------------------------------------|---------------------------------------------------------------------------------------|
| wind_turbine        |    |    |    |    |    |    |
| airplane            |    |    |    |    |    |    |
| rooftop_solar_panel |    |    |    |    |    |    |
| fountain            |   |   |   |   |   |   |
| toll_booth          |  |  |  |  |  |  |
| chimney             |  |  |  |  |  |  |
| radio_tower         |  |  |  |  |  |  |

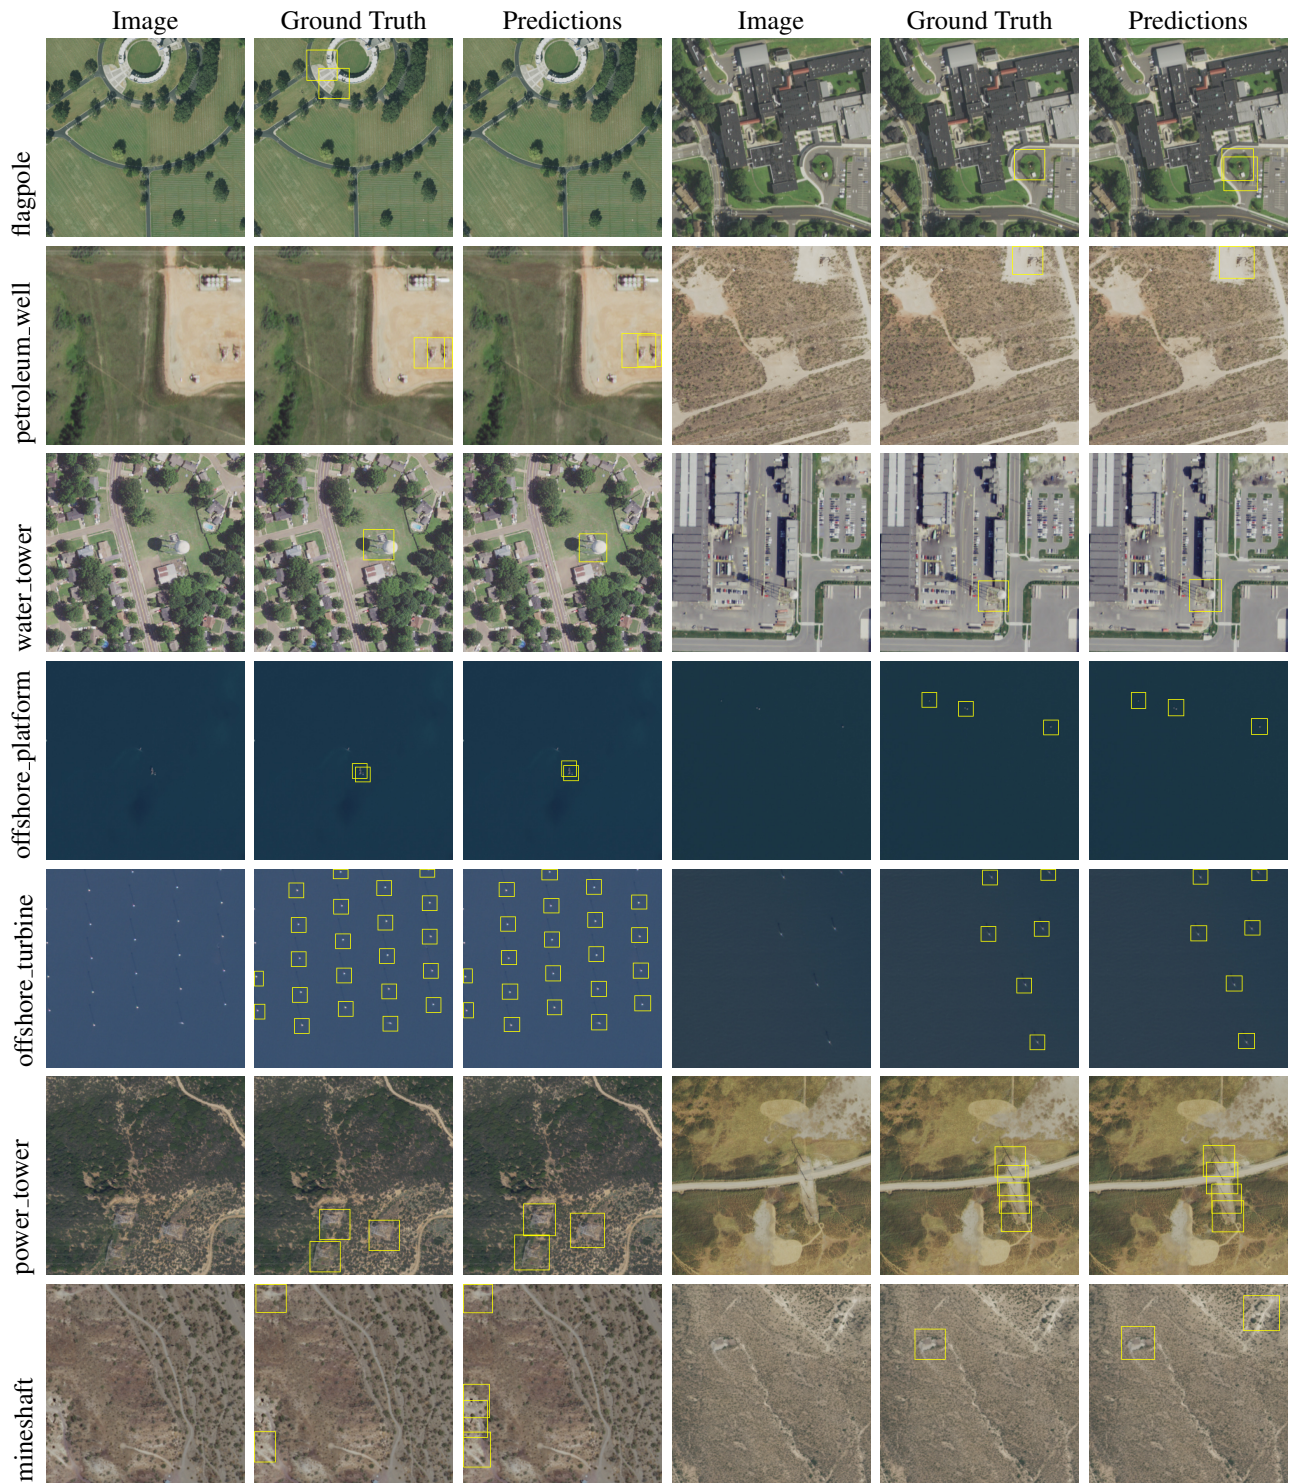

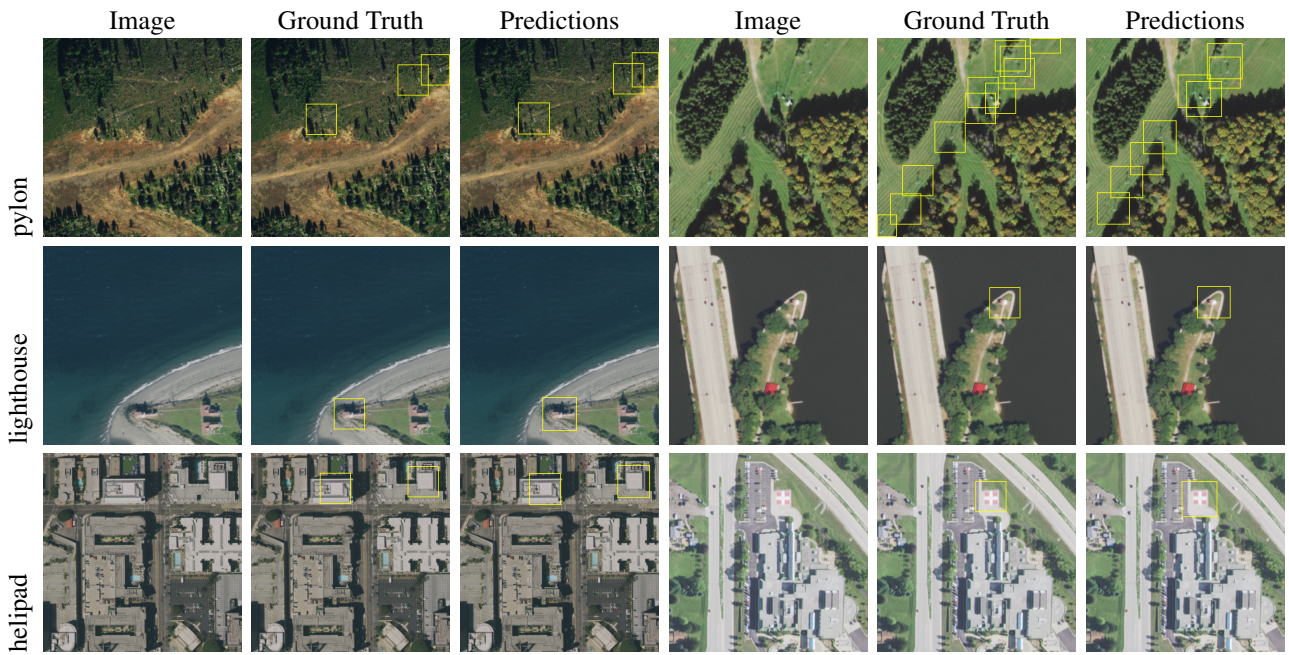

**Polygons**

|                | Image | Ground Truth | Predictions | Image | Ground Truth | Predictions |
|----------------|-------|--------------|-------------|-------|--------------|-------------|
| building       |       |              |             |       |              |             |
| dam            |       |              |             |       |              |             |
| solar_farm     |       |              |             |       |              |             |
| power_plant    |       |              |             |       |              |             |
| gas_station    |       |              |             |       |              |             |
| park           |       |              |             |       |              |             |
| parking_garage |       |              |             |       |              |             |

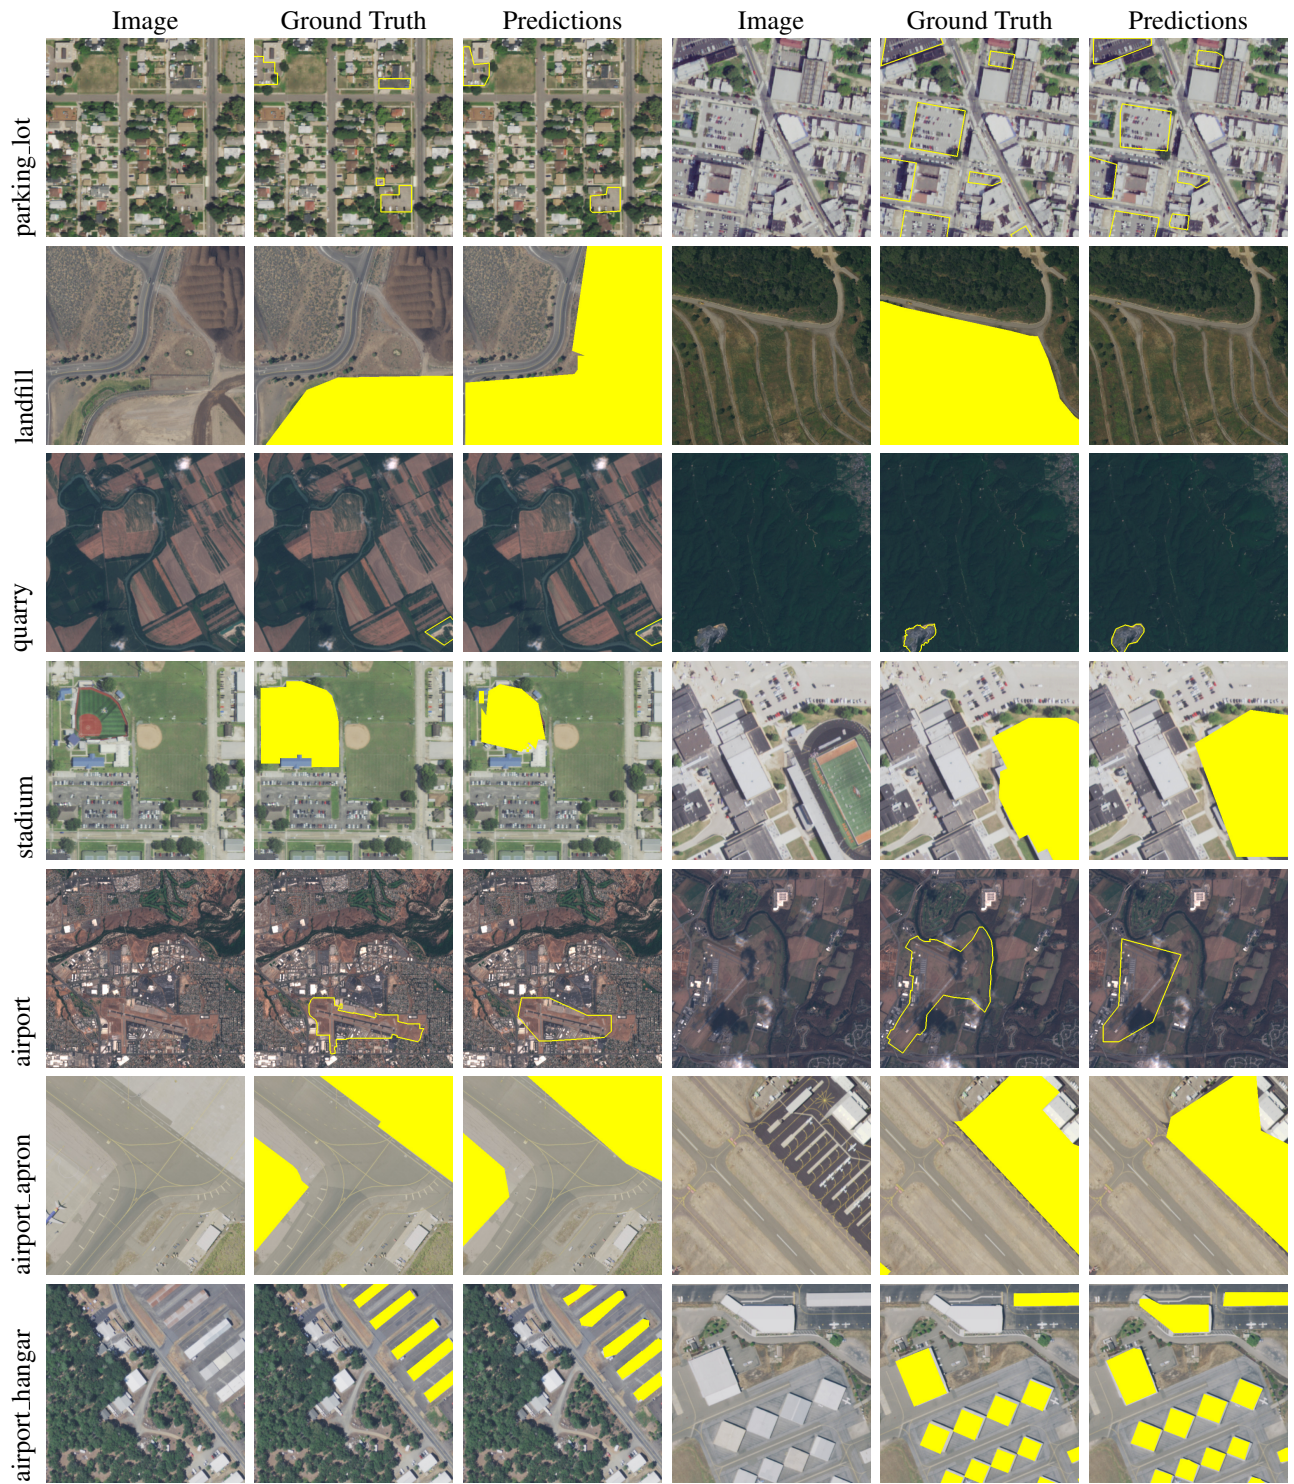

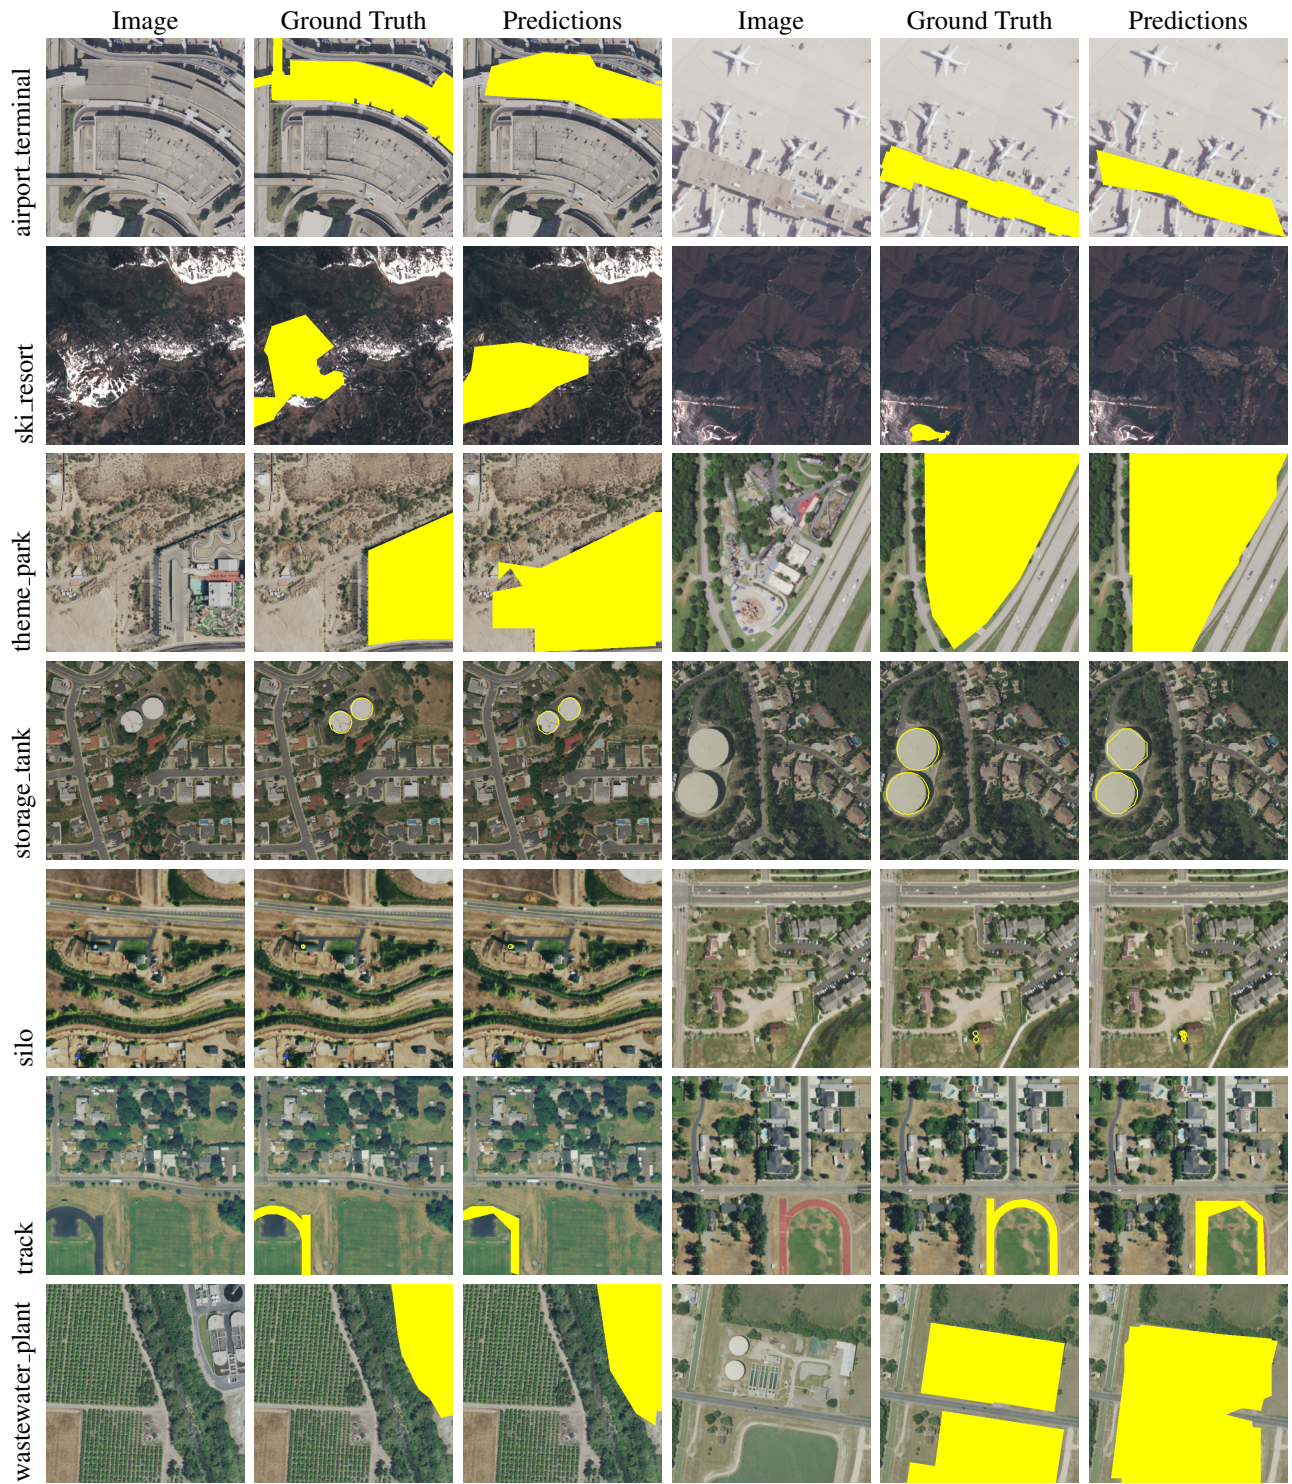

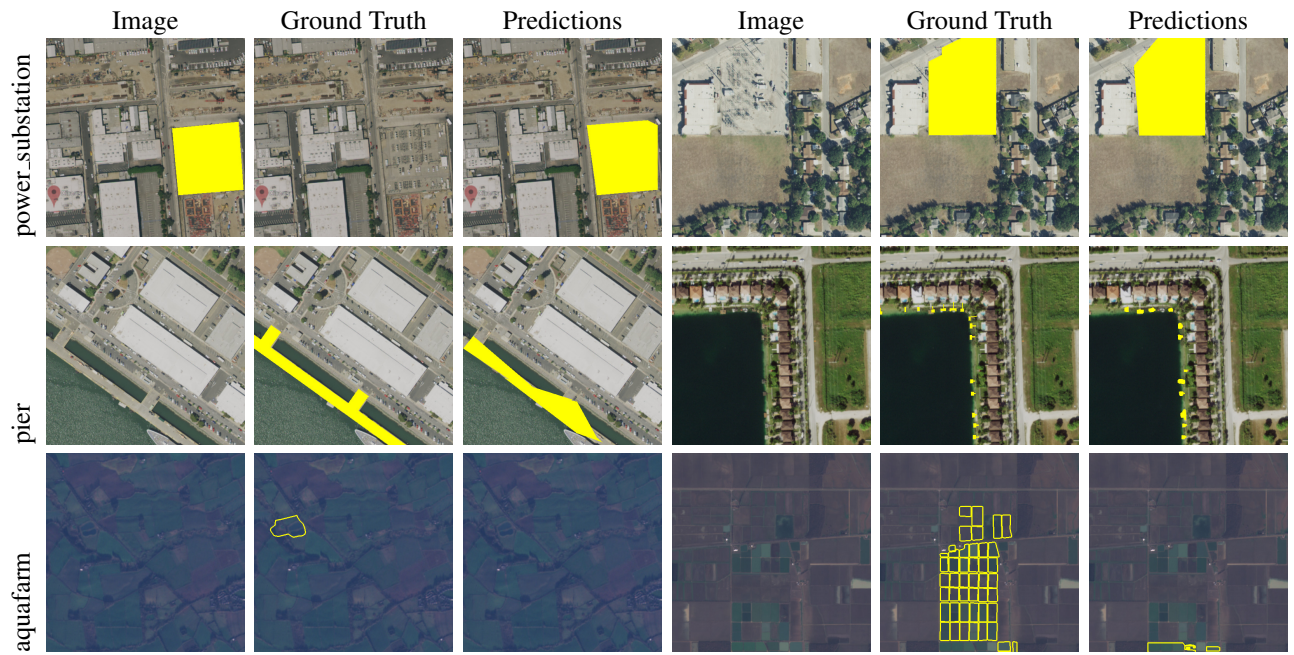



**Polylines**

|                 | Image | Ground Truth | Predictions | Image | Ground Truth | Predictions |
|-----------------|-------|--------------|-------------|-------|--------------|-------------|
| airport_runway  |       |              |             |       |              |             |
| airport_taxiway |       |              |             |       |              |             |
| raceway         |       |              |             |       |              |             |
| road            |       |              |             |       |              |             |
| railway         |       |              |             |       |              |             |
| river           |       |              |             |       |              |             |

## Segmentation

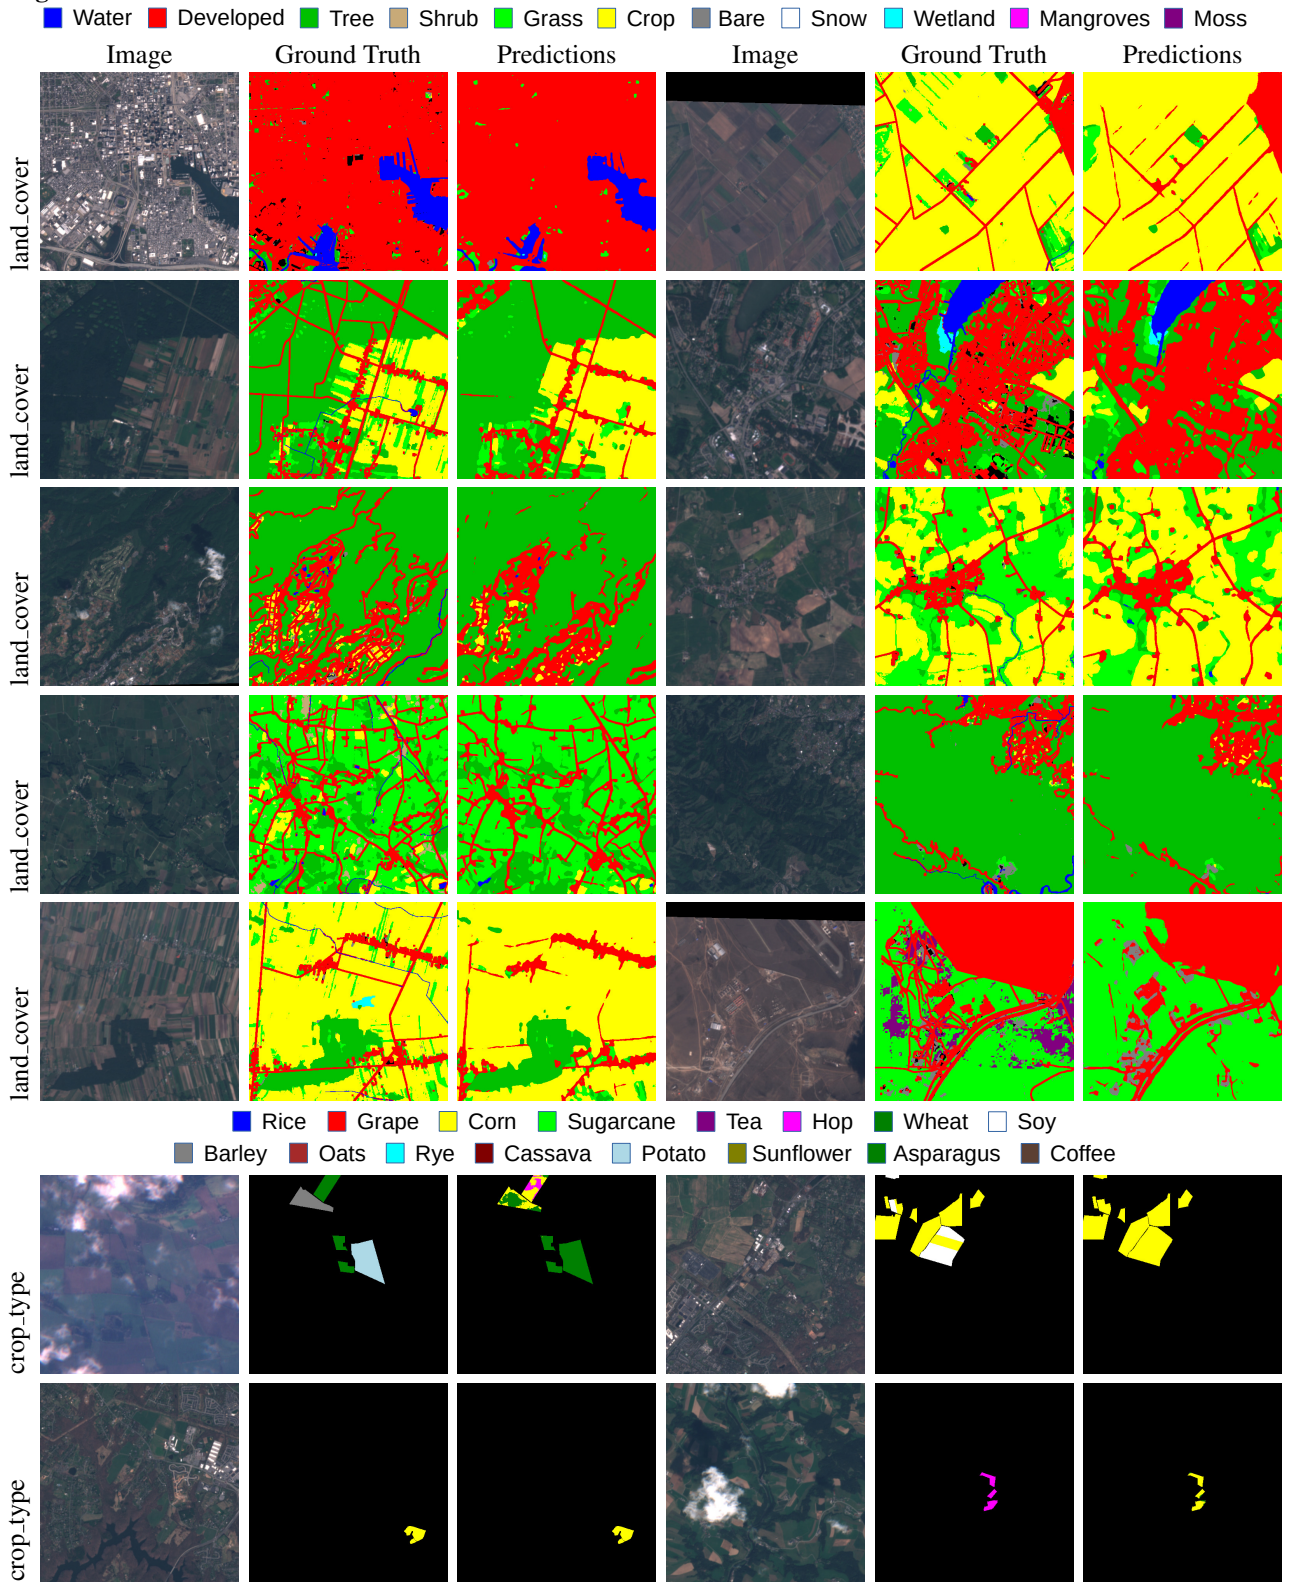

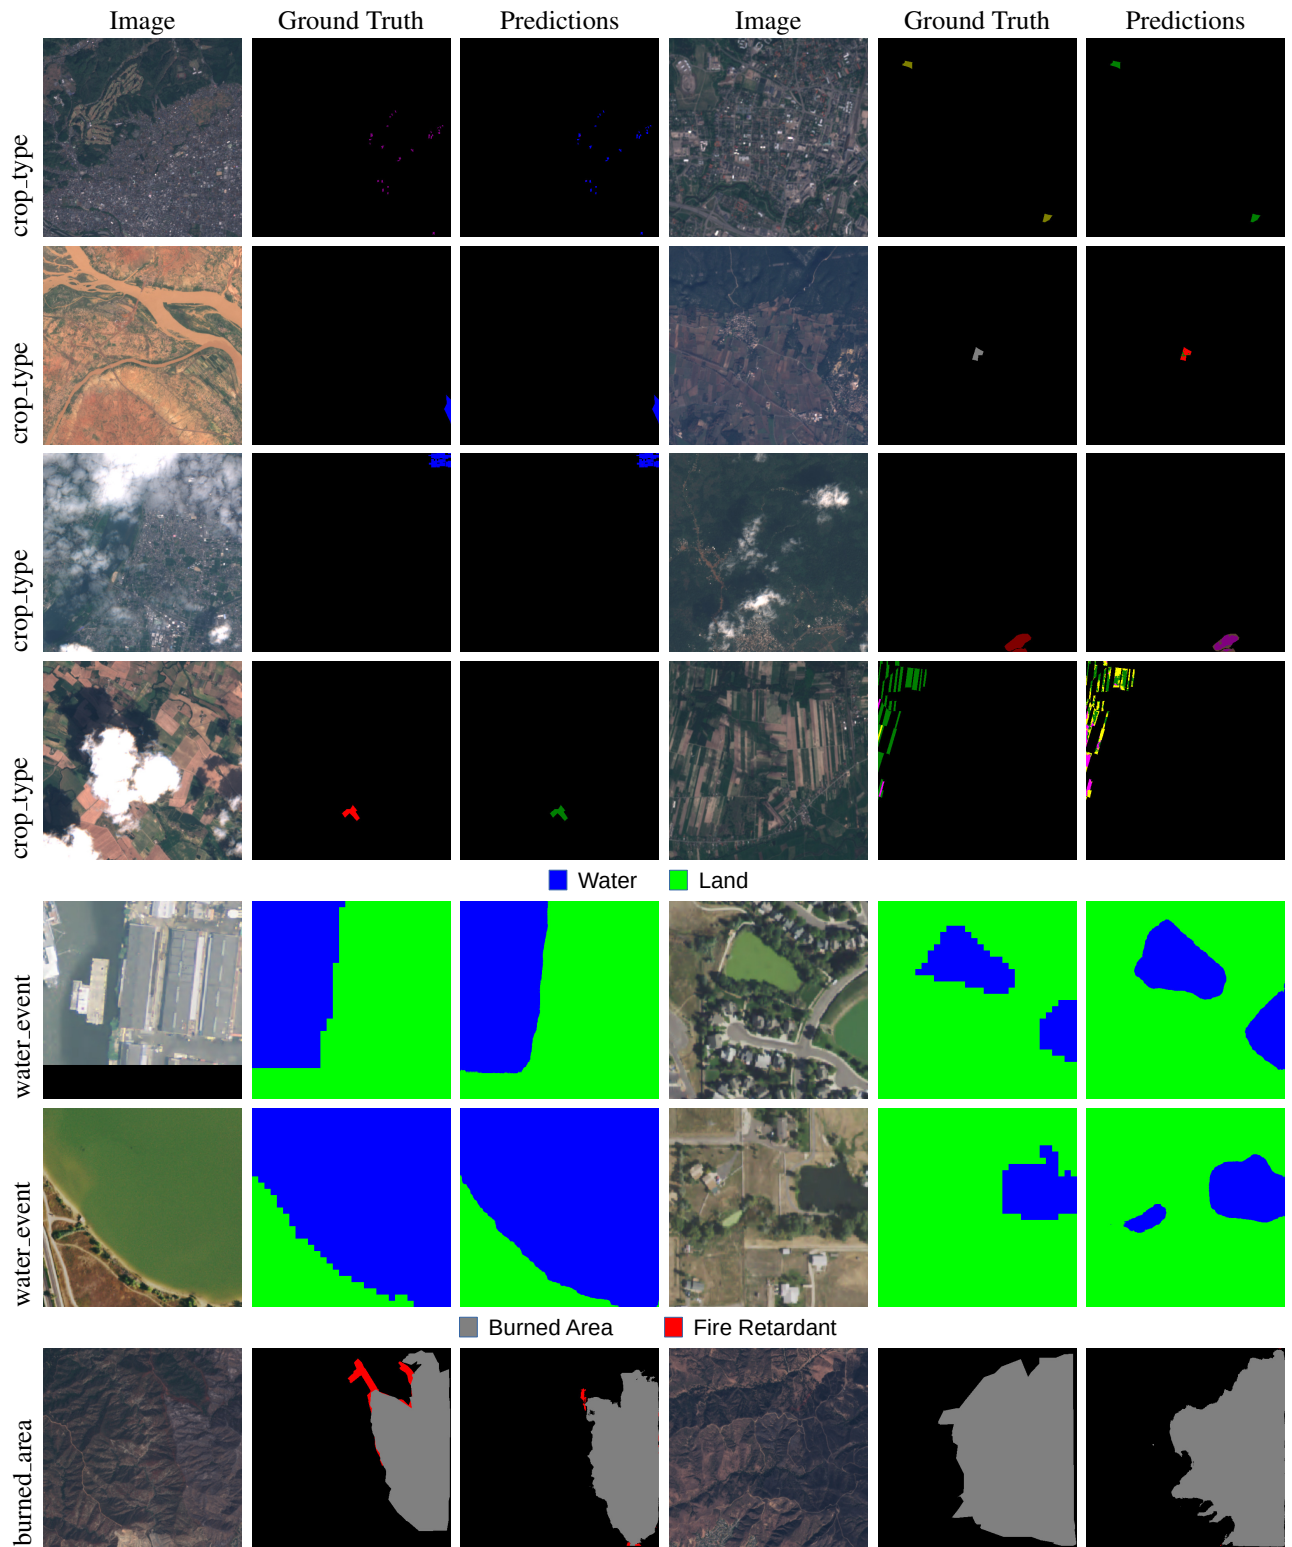

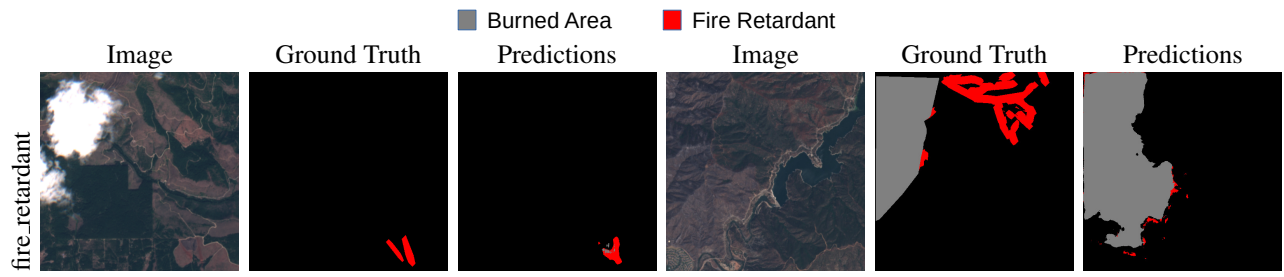

**Regression**

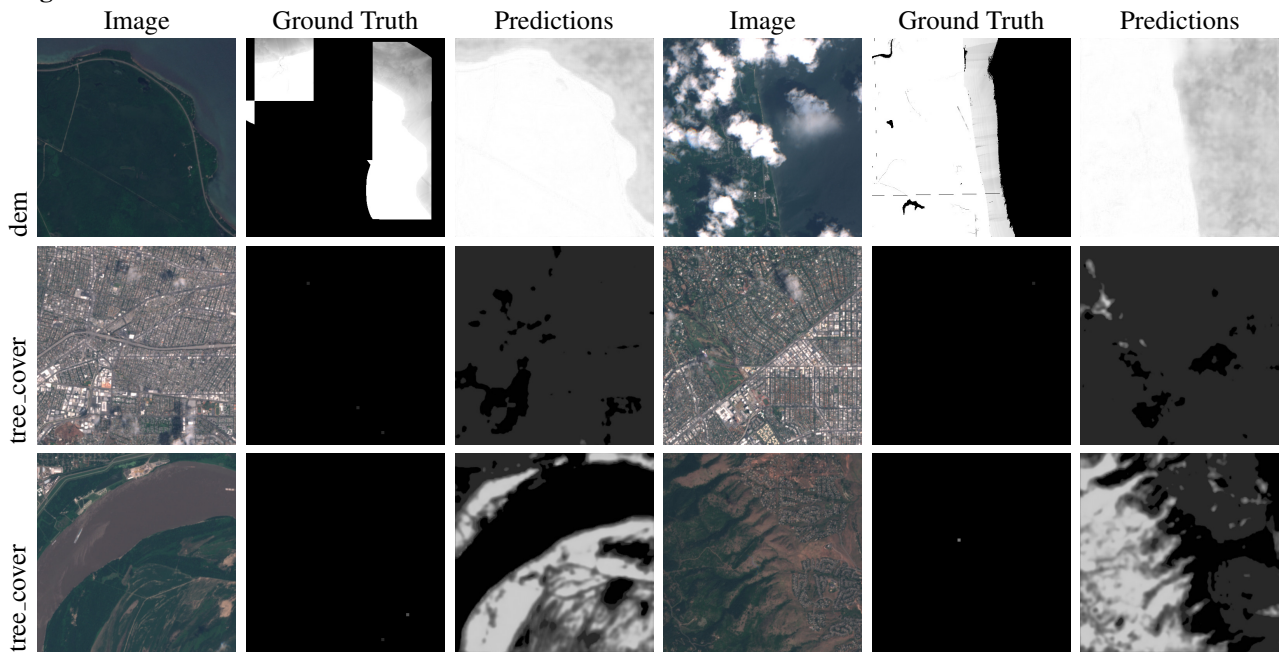

**Properties**

|            |                                                                                     |                                                                                     |                                                                                     |                                                                                      |                                                                                       |                                                                                       |
|------------|-------------------------------------------------------------------------------------|-------------------------------------------------------------------------------------|-------------------------------------------------------------------------------------|--------------------------------------------------------------------------------------|---------------------------------------------------------------------------------------|---------------------------------------------------------------------------------------|
| park_sport |    |    |    |    |    |    |
|            | GT: badminton<br>Pred: basketball                                                   | GT: badminton<br>Pred: volleyball                                                   | GT: badminton<br>Pred: basketball                                                   | GT: badminton<br>Pred: basketball                                                    | GT: badminton<br>Pred: basketball                                                     | GT: badminton<br>Pred: volleyball                                                     |
| park_sport |    |    |    |    |    |    |
|            | GT: baseball<br>Pred: baseball                                                      | GT: baseball<br>Pred: baseball                                                      | GT: baseball<br>Pred: baseball                                                      | GT: baseball<br>Pred: baseball                                                       | GT: baseball<br>Pred: baseball                                                        | GT: baseball<br>Pred: baseball                                                        |
| park_sport |    |    |    |    |    |    |
|            | GT: basketball<br>Pred: basketball                                                  | GT: basketball<br>Pred: basketball                                                  | GT: basketball<br>Pred: basketball                                                  | GT: basketball<br>Pred: basketball                                                   | GT: basketball<br>Pred: basketball                                                    | GT: basketball<br>Pred: basketball                                                    |
| park_sport |  |  |  |  |  |  |
|            | GT: cricket<br>Pred: cricket                                                        | GT: cricket<br>Pred: cricket                                                        | GT: cricket<br>Pred: cricket                                                        | GT: cricket<br>Pred: cricket                                                         | GT: cricket<br>Pred: cricket                                                          | GT: cricket<br>Pred: baseball                                                         |
| park_sport |  |  |  |  |  |  |
|            | GT: football<br>Pred: football                                                      | GT: football<br>Pred: football                                                      | GT: football<br>Pred: football                                                      | GT: football<br>Pred: football                                                       | GT: football<br>Pred: football                                                        | GT: football<br>Pred: football                                                        |
| park_sport |  |  |  |  |  |  |
|            | GT: rugby<br>Pred: soccer                                                           | GT: rugby<br>Pred: soccer                                                           | GT: rugby<br>Pred: soccer                                                           | GT: rugby<br>Pred: soccer                                                            | GT: rugby<br>Pred: soccer                                                             | GT: rugby<br>Pred: football                                                           |

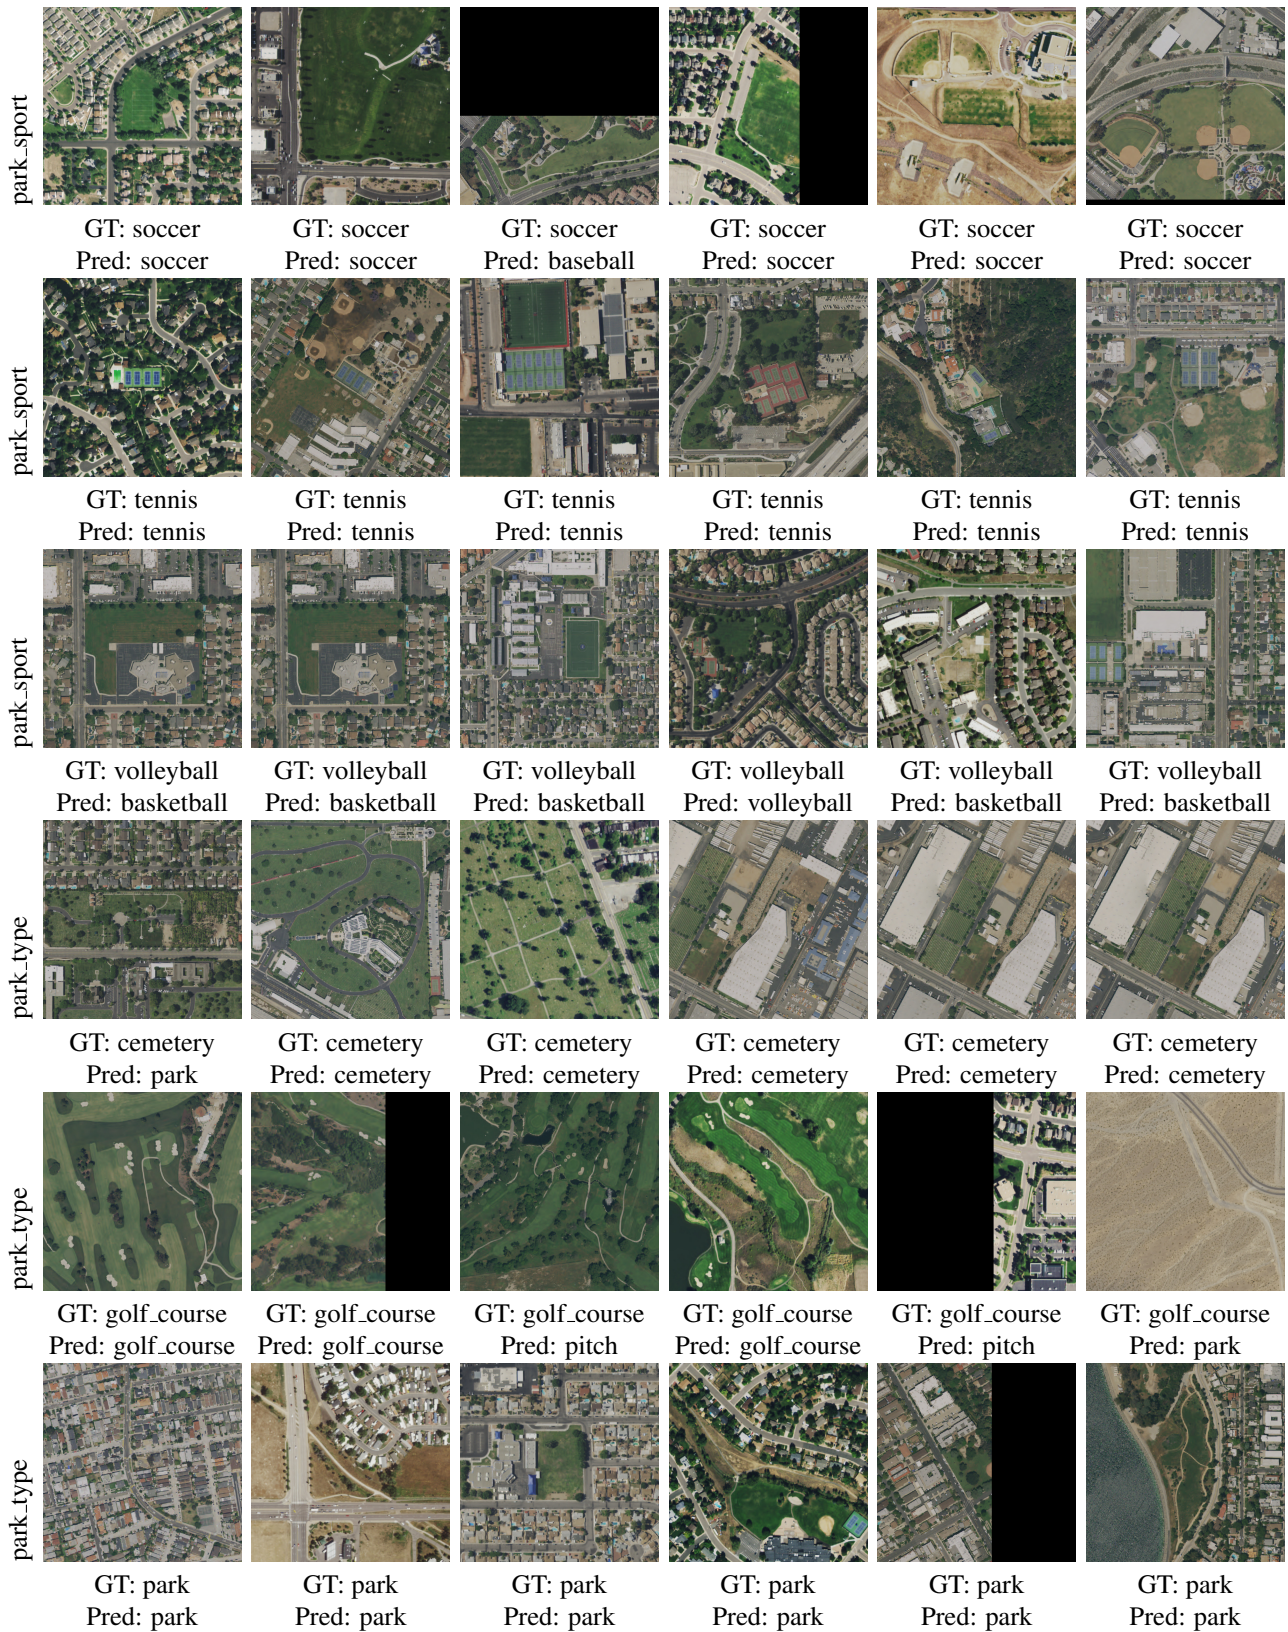

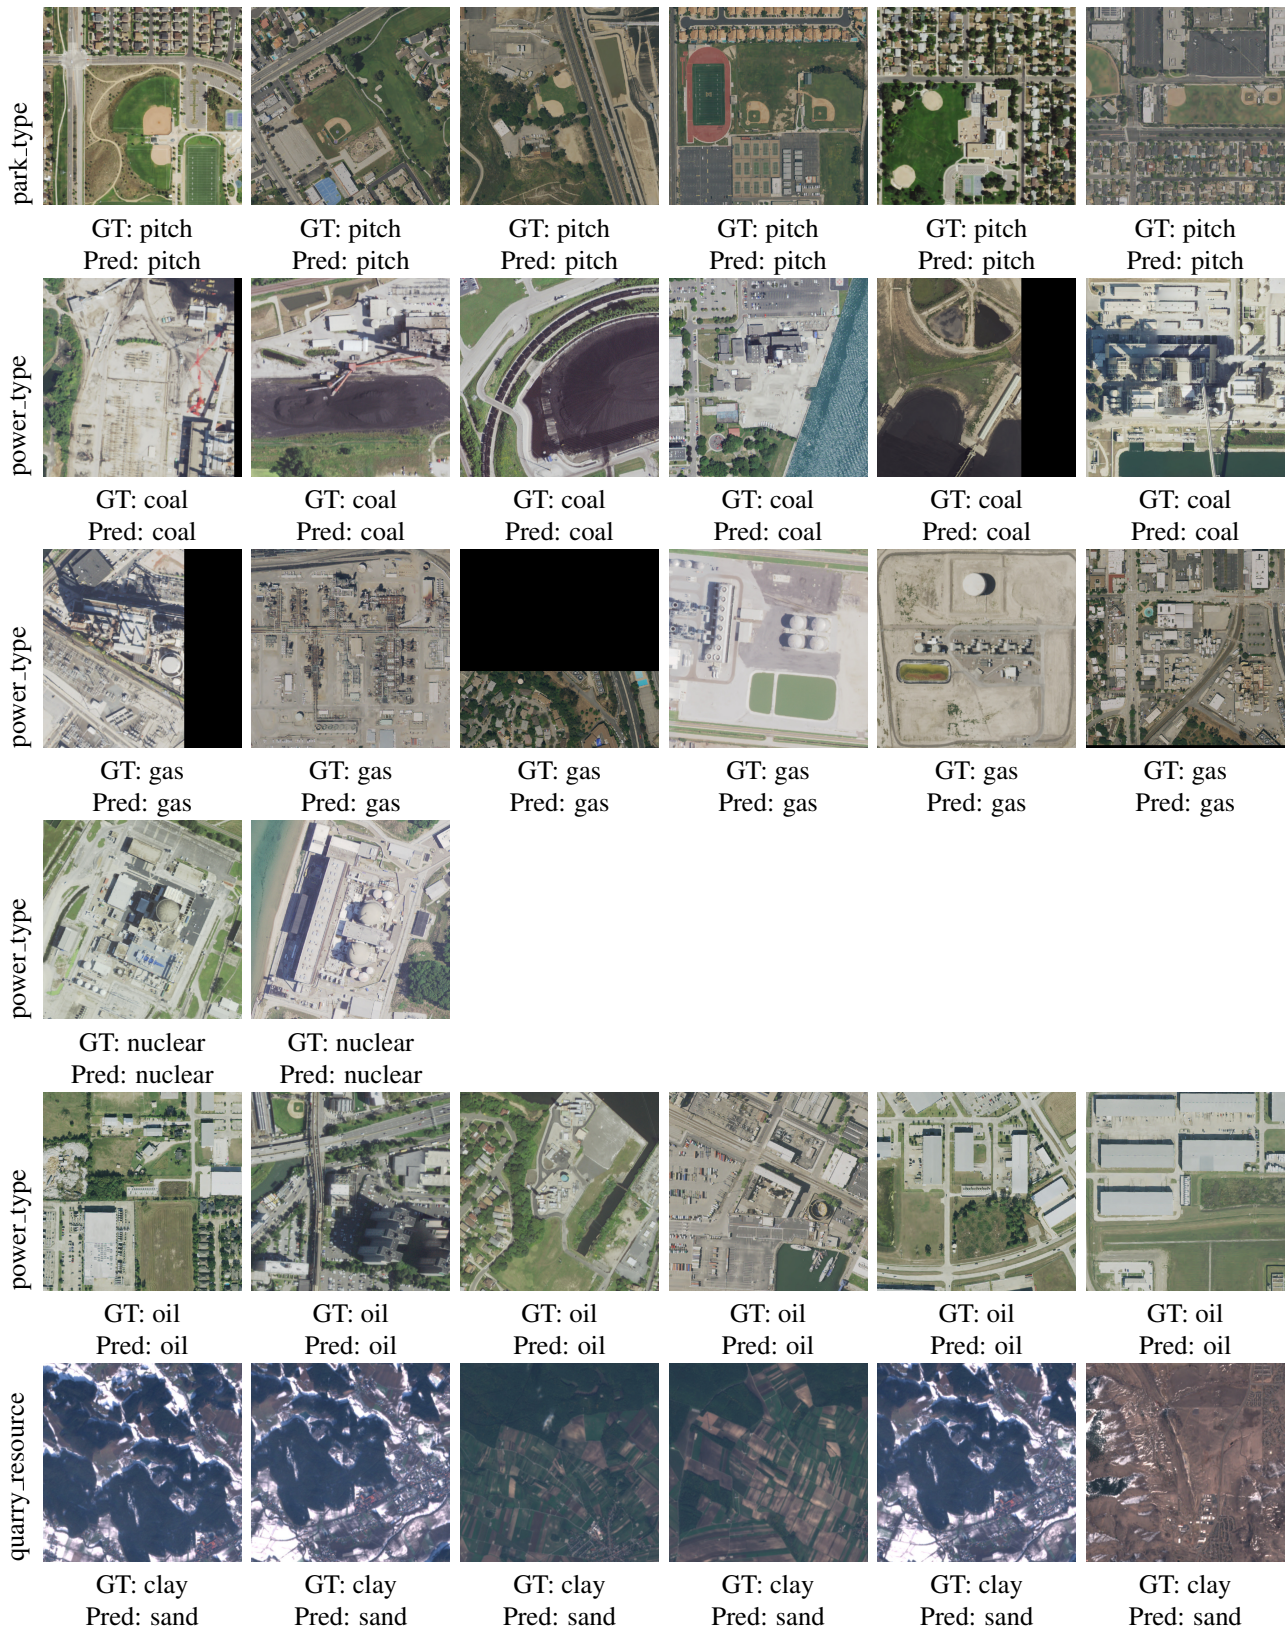



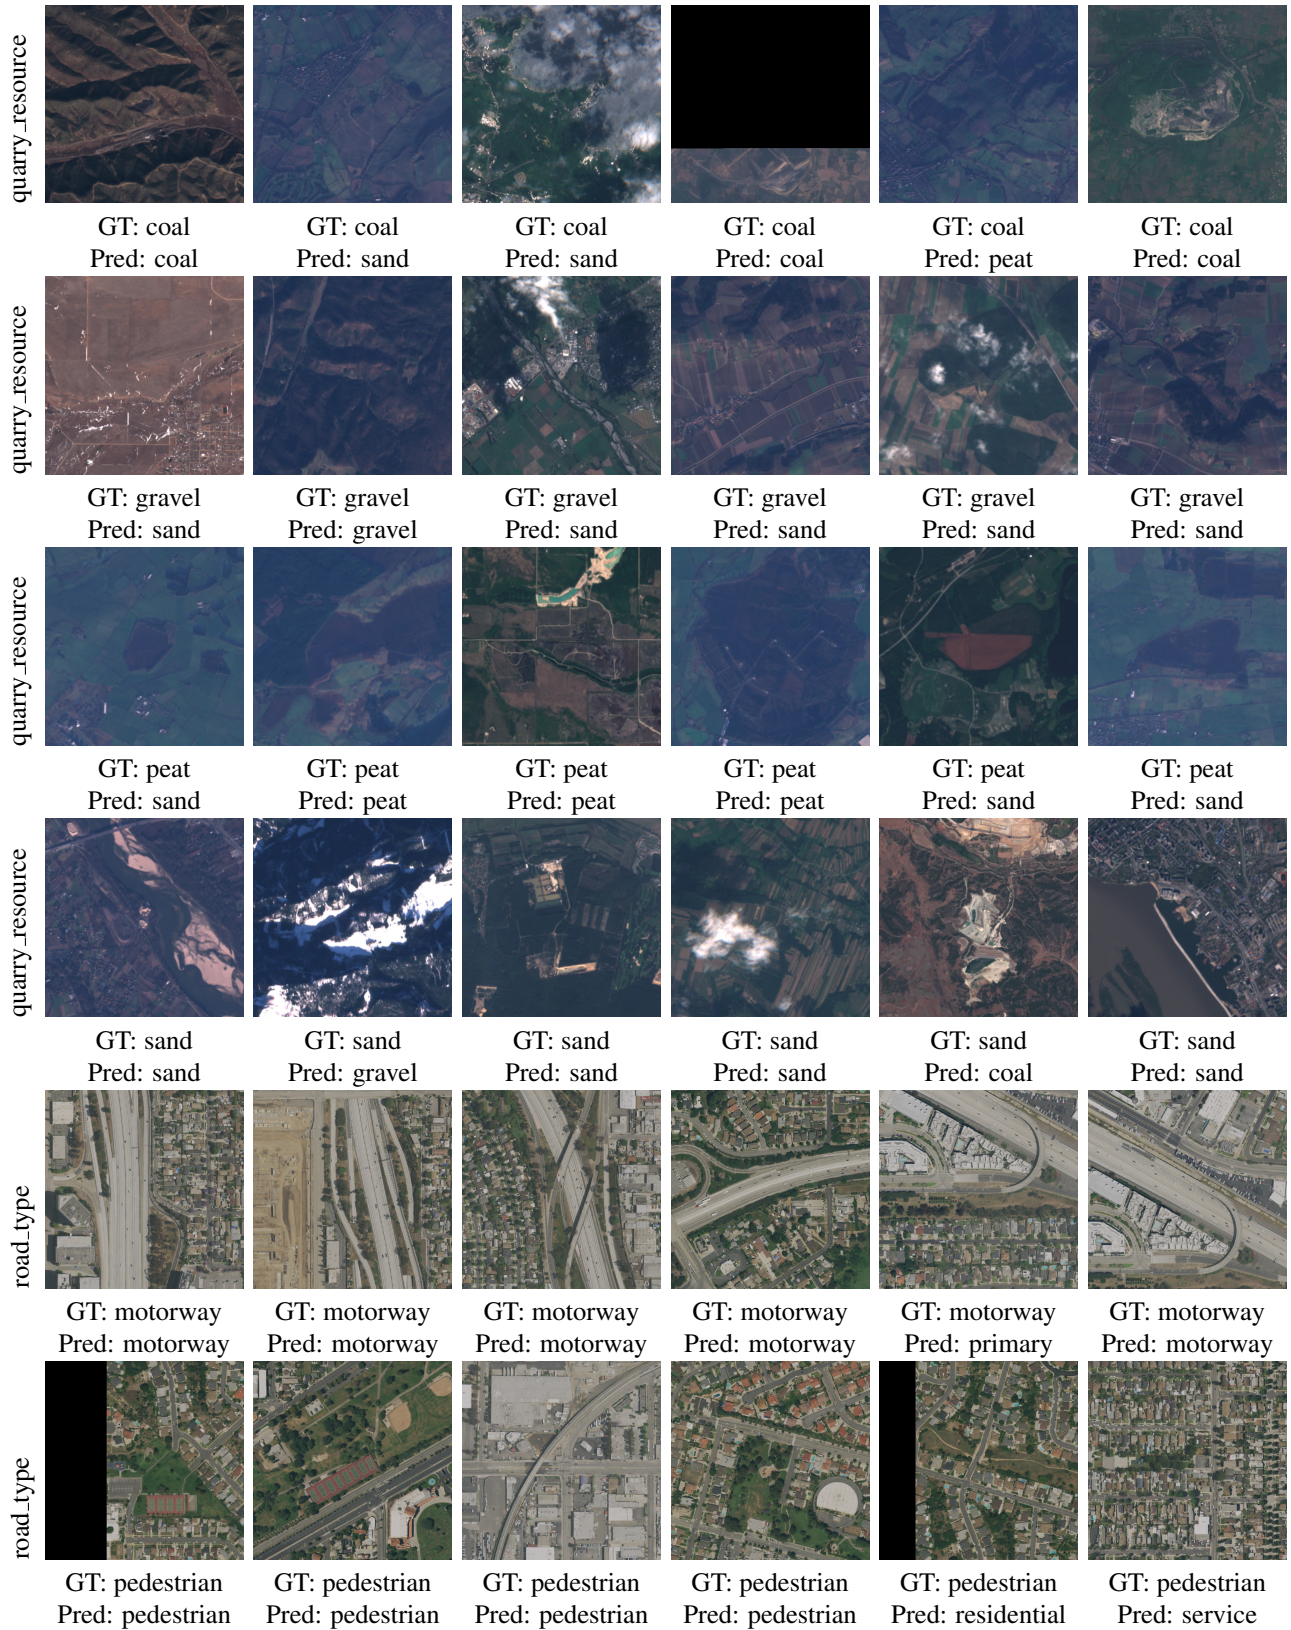

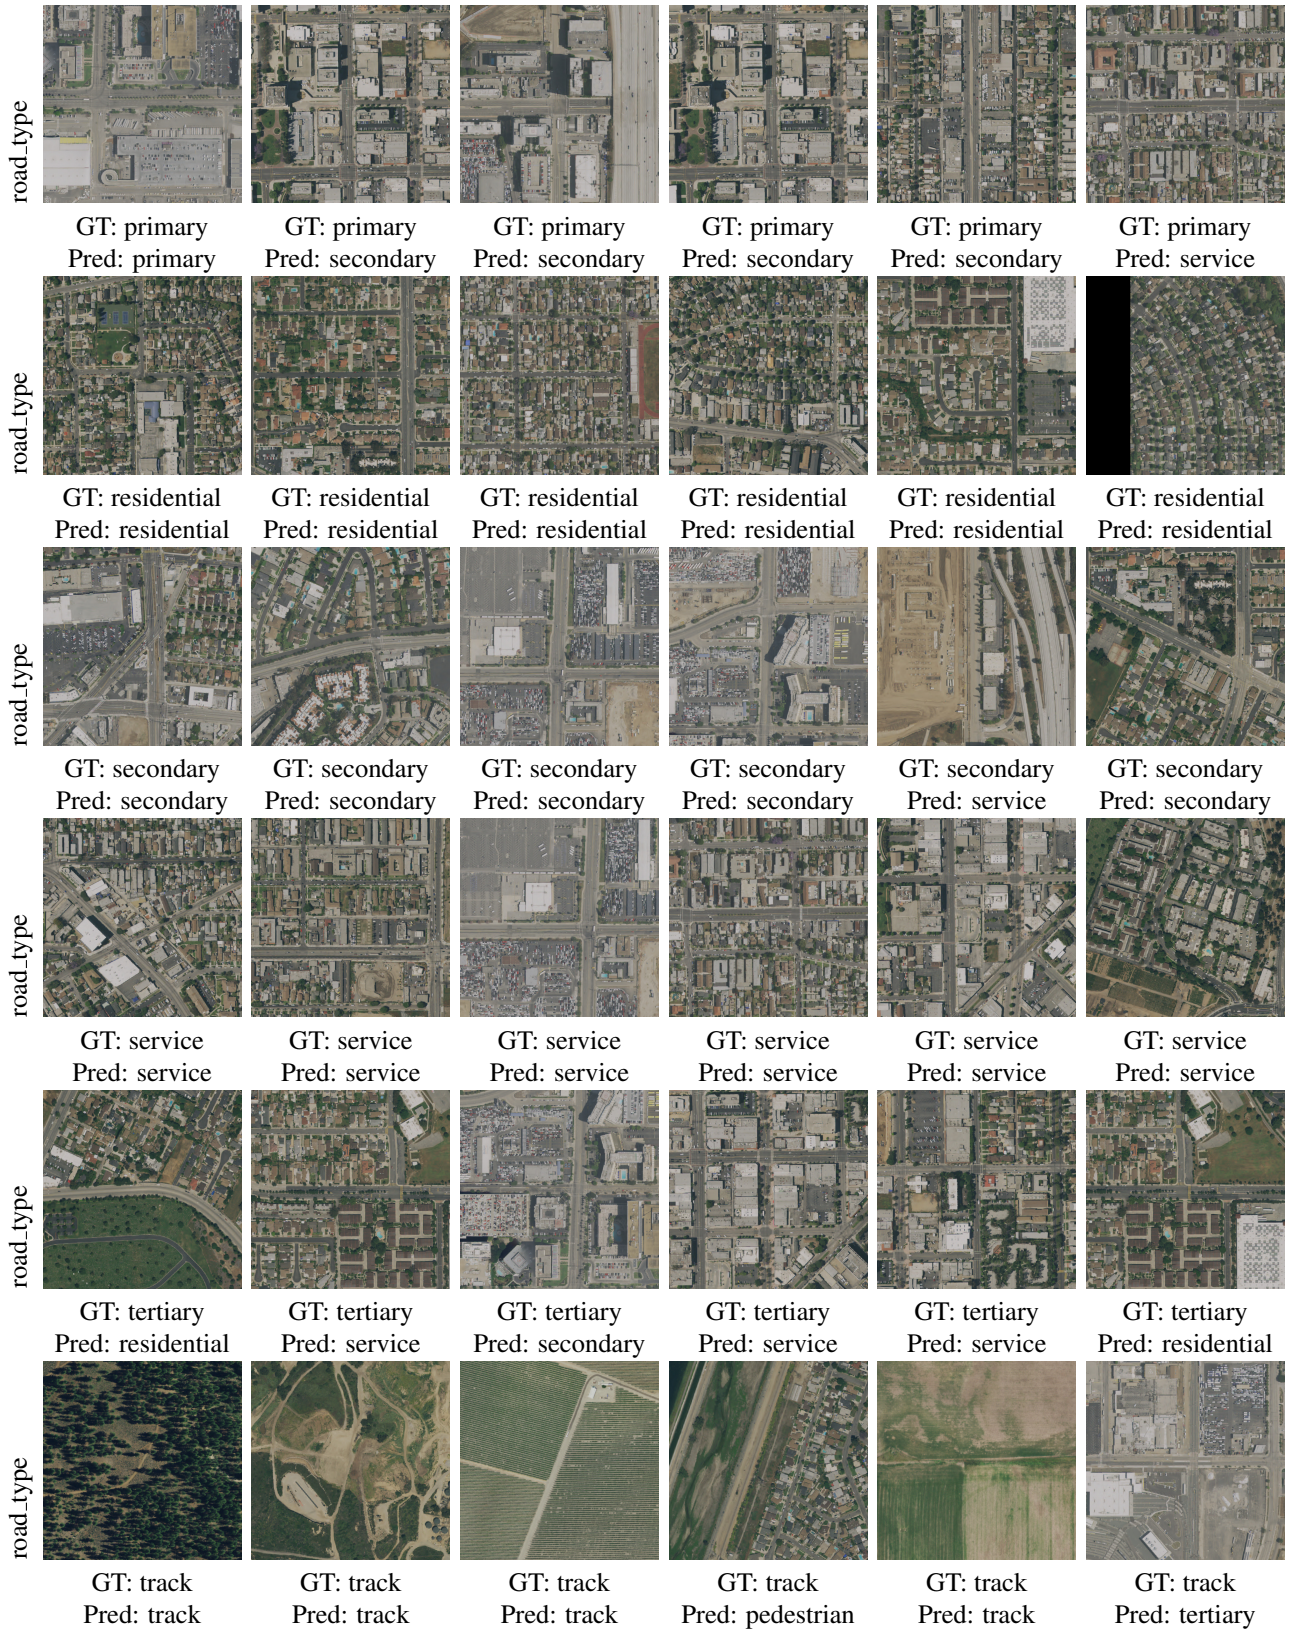

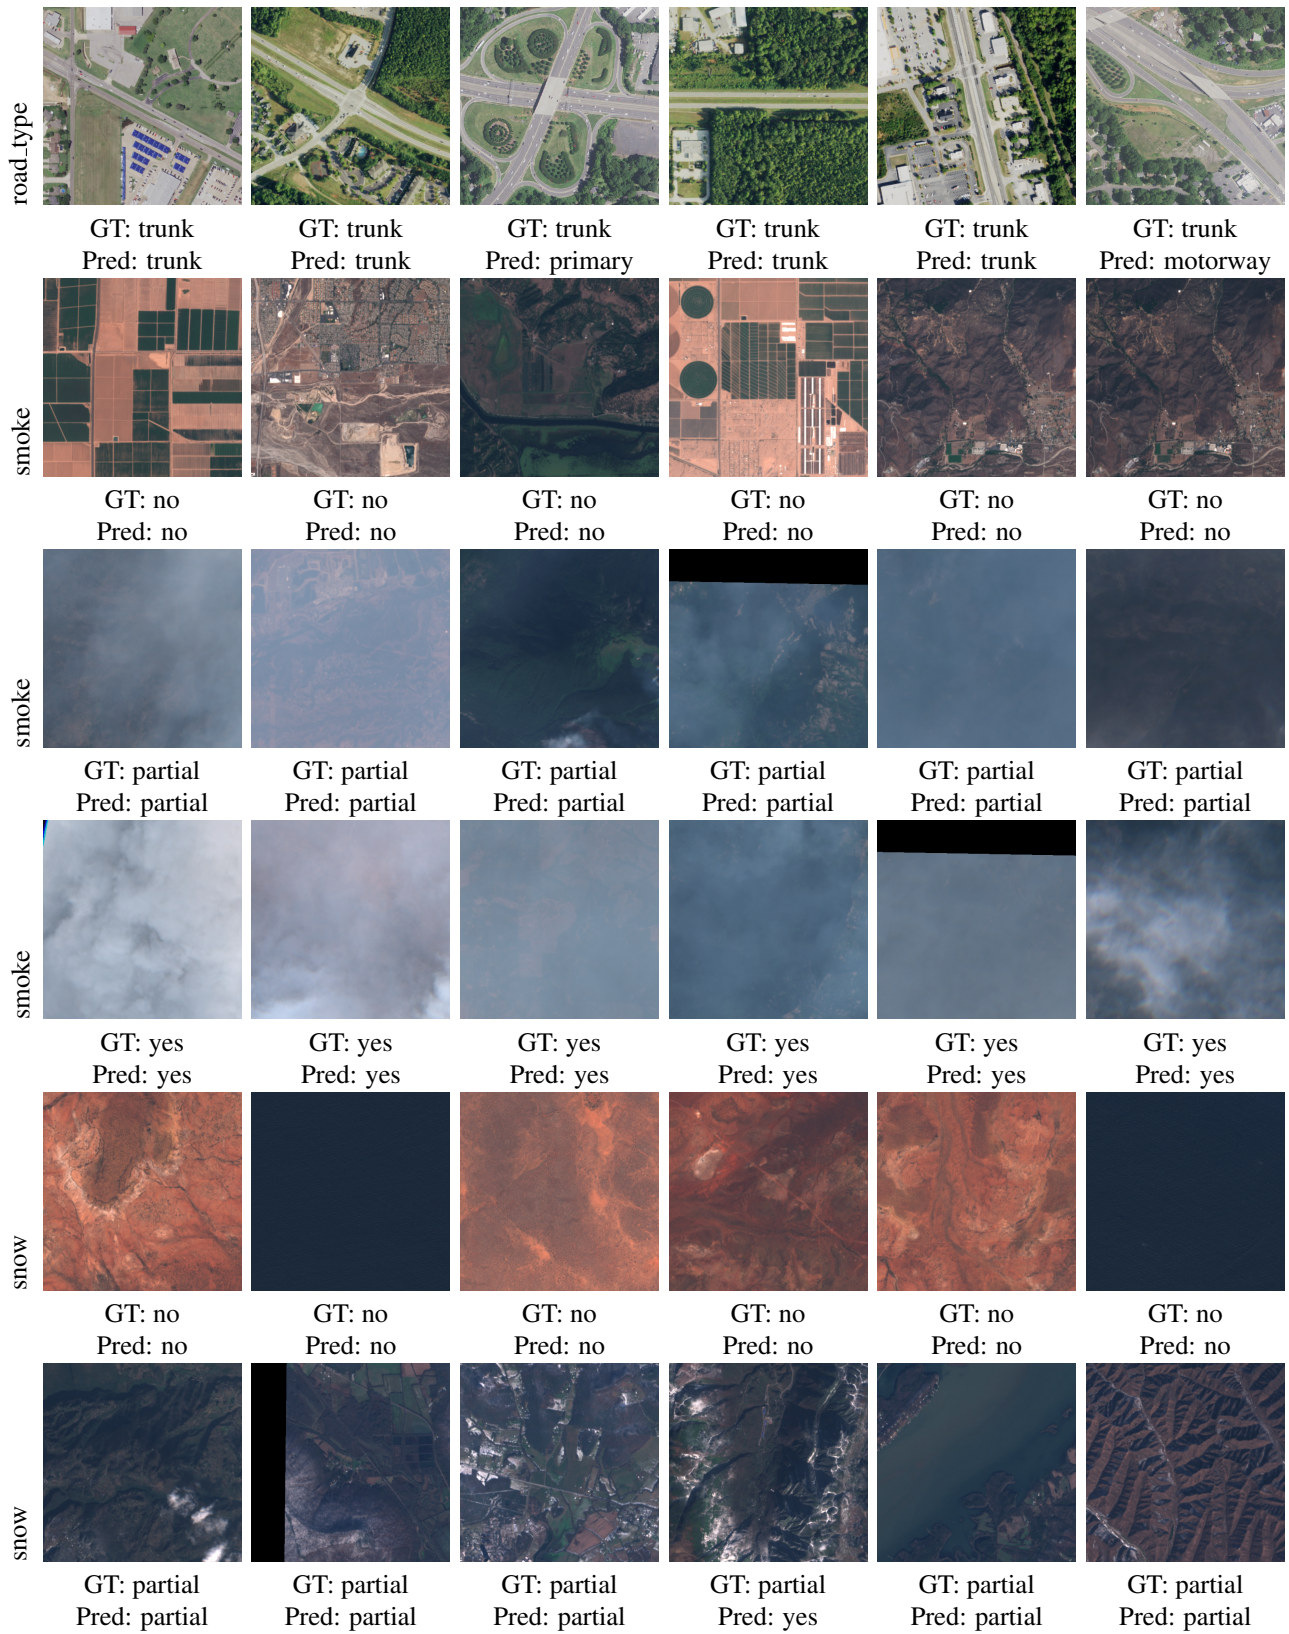

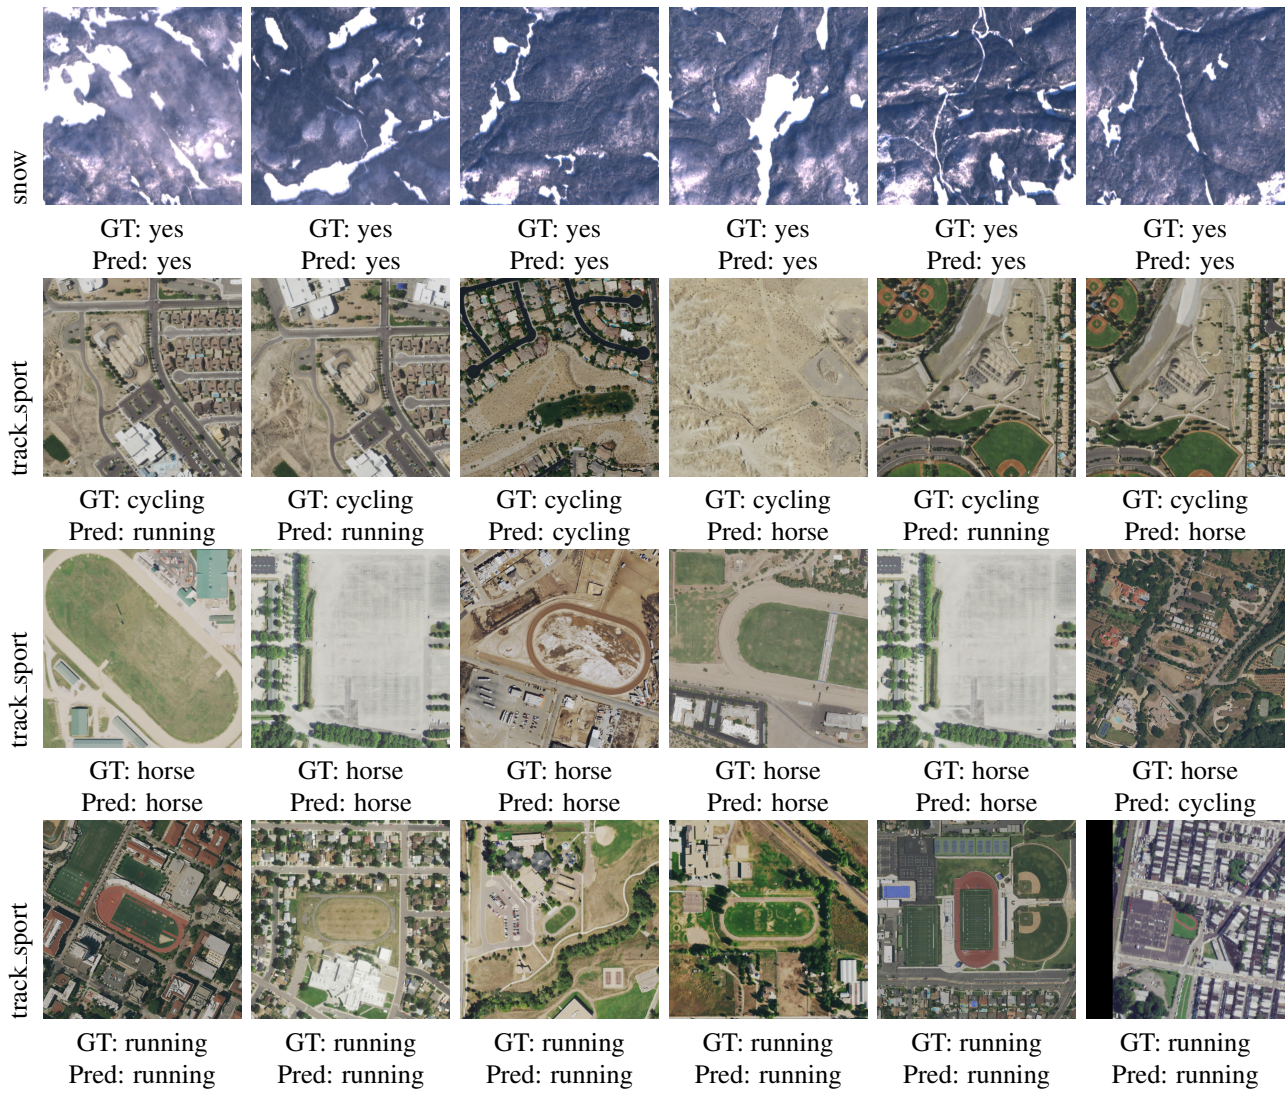

## References

- [1] A global flood events and cloud cover dataset (version 1.0), 2022. Cloud to Street, Microsoft, Radiant Earth Foundation.
- [2] Joe Avis, Henri Dolou, Jean Laporte, and François-Régis Martin-Lauzer. Sentinel Coastal Charting Worldwide. *ESA Report*, 2019.
- [3] Xinlei Chen, Haoqi Fan, Ross Girshick, and Kaiming He. Improved Baselines with Momentum Contrastive Learning. *arXiv preprint arXiv:2003.04297*, 2020.
- [4] Oscar Manas, Alexandre Lacoste, Xavier Giro i Nieto, David Vazquez, and Pau Rodriguez. Seasonal Contrast: Unsupervised Pre-Training from Uncurated Remote Sensing Data. In *Proceedings of the IEEE/CVF International Conference on Computer Vision (ICCV)*, 2021.
- [5] Fernando Paolo, Tsu ting Tim Lin, Ritwik Gupta, Bryce Goodman, Nirav Patel, Daniel Kuster, David Kroodsma, and Jared Dunnmon. xView3-SAR: Detecting Dark Fishing Activity Using Synthetic Aperture Radar Imagery. *Neural Information Processing Systems*, 2022.
- [6] Ruben Van De Kerchove, Daniele Zanaga, Wanda Keersmaecker, Niels Souverijns, Jan Wevers, Carsten Brockmann, Alex Grosu, Audrey Paccini, Oliver Cartus, Maurizio Santoro, et al. ESA WorldCover: Global land cover mapping at 10 m resolution for 2020 based on Sentinel-1 and 2 data. In *AGU Fall Meeting Abstracts*, volume 2021, pages GC451–0915, 2021.
